# Supplementary material for: Chronic Pediatric Immune Thrombocytopenia Is Not Associated With Herpes Virus Infection Status
Source: Front Pediatr. 2021 Dec 2;9:641535. doi: 10.3389/fped.2021.641535 (PMC8678596; doi:10.3389/fped.2021.641535)
Supplement: Supplementary file 1 [file Data_Sheet_1.xls]

## Sheet: ITP with herpes virus infection
name	onset of months	Gender(male=1)	age≥3	Fever(yes=1)	lever(yes=1)	spleen(yes=1)	Epistaxis(yes=1)	WBC	Hb	RBC	PLT	PLT＜30-1	C3	C4	C410-40	C410-1	CMVM1	CMVM1-1	CMVG1	CMVG1-1	HSVM positive-1	HSV1G1	HSV1Gpositive-1	HSV2Mpositive-1	HSV2G1	HSV2G1-1	EBVCAM positive-1	EBVCAGpositive-1	EBNAGpositive-1	EBVEAM positive-1	EBVEAGpositive-1	CD3A54-80	CD4A25-40	CD8A18-30	CD4/80.98-1.94	CD16+568.1-25.6	CD19A7-20	PLTcharge	PLT(1 month)	PLT(3months)	PLT(12 months)	chronic(yes=1)
1	1	1	0	0	0	0	0	21.6	90	3.06	9	1	89.9	1	20	0	4.4	1	500	1	0	22.15	1	0	24.8	1	0	1	1	0	1	NA						405	389	334	268	0
2	1	1	0	0	0	0	0	5.7	44	1.57	7	1	88.5	1	23.4	0	1.88	1	500	1	0	18.04	1	0	8.69	1	0	1	1	0	1	NA						392	347	304		0
3	1	1	0	0	1	1	0	11.7	137	4.33	6	1	90.7	0	37.1	0	4.07	1	500	1	0	12.16	1	0	7.6	1	0	1	1	0	0	NA						178	359	291		0
4	1	0	0	0	0	0	0	8.5	89	2.88	3	1	78.4	1	19.2	0	6.466	1	500	1	0	16.4	1	0	9.12	1	0	1	1	0	0	NA						276	260	284		0
5	3	1	0	0	0	0	0	9.5	113	4.56	3	1	85.1	1	20.8	0	3.65	1	500	1	0	16.1	1	0	9.56	1	0	1	1	0	0	NA						303	551	371		0
6	3	0	0	0	0	0	0	13	109	3.82	11	1	79.3	1	14	0	1.28	1	500	1	0	15.97	1	0	9.19	1	0	1	1	0	0	NA						205	272	282	301	0
7	4	1	0	0	0	0	0	6.8	114	5.17	25	1	82.2	1	23.9	0	5.48	1	500	1	0	22.37	1	0	13.17	1	0	1	1	1	0	NA						386	339	317		0
8	4	0	0	0	1	0	0	10.2	122	4.65	6	1	115	0	20	0	1.91	1	156.7	1	0	12.25	1	0	7.8	1	0	0	1	1	0	NA						269	188	236		0
9	4	1	0	0	0	0	0	9.2	99	3.93	11	1	93.5	0	23.8	0	10.63	1	500	1	0	14.34	1	0	8.63	1	0	1	1	0	0	NA						279	364	241		0
10	4	1	0	0	0	0	0	5.5	99	3.39	14	1	81.9	1	18.1	0	2.94	1	10.26	1	0	3.6	1	0	0.065	0	0	1	1	0	0	NA						477	243	419	287	0
11	7	1	0	0	0	0	0	6.5	115	4.17	10	1	NA		NA		1.74	1	500	1	0	14.67	1	0	7.29	1	0	1	1	0	0	NA						544	505	526	388	0
12	7	1	0	0	1	0	0	12.8	121	4.67	4	1	NA		NA		1.17	1	500	1	0	18.34	1	0	9.98	1	0	1	1	0	0	NA						472	393	303		0
13	8	1	0	0	1	0	0	15	91	3.57	11	1	83.5	1	20.5	0	3.65	1	262.4	1	0	7.33	1	0	3.61	1	0	1	1	0	0	NA						223	206	223		0
14	8	0	1	0	0	0	0	8.8	134	4.94	30	1	117	0	19.3	0	1.24	1	120.1	1	0	0.017	0	0	0.092	0	0	1	1	1	0	67.67	33.24	28.97	1.15	8.28	22.66	216	61	88	156	0
15	8	1	1	0	1	1	0	10.3	141	5.06	7	1	137	0	33.9	0	2.47	1	500	1	0	17.83	1	0	9.44	1	0	1	1	0	1	83.18	24.91	56.59	0.44	8.22	8.17	241	189	286		0
16	8	1	0	0	1	0	0	8.2	94	3	5	1	86.2	1	17.1	0	2.78	1	500	1	0	24.06	1	0	7.11	1	0	1	1	0	0	62.71	29.6	32.12	0.92	7.48	27.82	298	360	338		0
17	9	1	1	0	0	0	0	13	128	4.63	11	1	140	0	20.8	0	2.7	1	278.4	1	0	20.35	1	0	3.9	1	0	1	1	0	0	NA						166	94	41	NA	1
18	10	1	0	0	1	0	0	19.2	108	3.91	6	1	100	0	13.8	0	1.26	1	500	1	0	30.95	1	0	13.81	1	0	1	1	0	1	60.52	26.11	31.54	0.83	13.46	25.73	149	349	212		0
19	11	1	0	0	0	0	0	9.1	93	3.36	6	1	NA		NA		1.22	1	500	1	0	16.39	1	0	8.16	1	0	1	1	0	0	NA						396	NA			0
20	11	1	0	0	0	0	0	7.9	105	3.35	11	1	69.7	1	12.3	0	1.35	1	500	1	0	33.04	1	0	11.59	1	0	1	1	0	1	NA						317	442	381		0
21	12	1	0	0	1	1	0	10	84	2.78	11	1	NA		NA		1.14	1	500	1	0	69.76	1	0	7.01	1	0	1	1	0	0	NA						344	267	327		0
22	1	0	0	0	1	0	0	8.7	115	4.43	9	1	56	1	8.94	1	4.66	1	500	1	0	21.08	1	0	10.62	1	0	1	1	0	0	70.81	35	35.18	1	9.96	16.78	345	220	56	155	0
23	2	1	0	0	0	0	0	8.5	116	4.89	13	1	79.7	1	11.3	0	1.83	1	500	1	0	17.35	1	0	9.51	1	0	1	1	0	0	69.74	42.76	25.61	1.67	9.61	18.08	22	139	151	142	0
24	3	0	0	0	0	0	0	11.3	120	3.91	1	1	4.53	1	1.66	1	5.18	1	500	1	0	16.37	1	0	6.14	1	0	1	1	0	0	68.67	34.93	32.85	1.06	6.76	22.6	250	357	NA		0
25	4	1	0	0	0	0	0	6.8	103	3.69	1	1	89.6	1	18.3	0	5.02	1	500	1	0	20.67	1	0	7.85	1	0	1	1	0	0	74.85	42.66	29.86	1.43	3.28	21.57	539	397	NA		0
26	4	1	0	0	1	0	0	18.8	102	3.27	4	1	167	0	52	0	14.61	1	412	1	0	10.29	1	0	6.15	1	0	1	1	0	0	NA						215	94	126	NA	0
27	5	1	0	0	0	0	0	8.4	112	3.52	56	0	73.4	1	11.4	0	5.16	1	14.9	1	0	5.98	1	0	0.083	0	0	1	1	0	0	67.49	44.35	18.27	2.4	14.19	14.68	93	160	192	236	0
28	5	1	0	0	0	0	0	6.5	115	4.18	10	1	62.3	1	9.32	1	1.32	1	500	1	0	33.93	1	0	17.67	1	0	1	1	0	0	NA						708	572	552	NA	0
29	5	1	0	0	0	0	0	4.1	104	3.8	11	1	NA		NA		2.12	1	500	1	0	27.32	1	0	14.94	1	0	1	1	0	0	NA						372	440			0
30	6	0	0	0	0	0	0	8.7	111	4.17	2	1	61.5	1	11.9	0	1.24	1	500	1	0	15.8	1	0	8.5	1	0	1	1	0	0	NA						637	425	252	NA	0
31	8	1	0	0	0	0	0	7.7	103	4.57	10	1	84.7	1	10.4	0	1.02	1	455.9	1	0	13.3	1	0	7.34	1	0	1	1	1	0	NA						313	403	343	NA	0
32	8	1	0	0	0	0	0	6.34	100	3.42	5	1	73.2	1	19.7	0	1.44	1	500	1	0	20.63	1	0	12.9	1	0	1	1	0	0	NA						229	370	335	NA	0
33	8	1	0	0	0	0	0	13.78	114	3.56	6	1	79.4	1	20.3	0	1.44	1	498.8	1	0	20.16	1	0	8.04	1	0	1	1	0	0	NA						327	396	309	NA	0
34	10	1	0	0	0	0	0	15.36	107	4.62	65	0	149	0	29.9	0	15.86	1	10.33	1	0	0.02	0	0	0.09	0	0	0	0	0	0	NA						121	101	156	49	0
35	10	0	0	0	0	0	0	7.37	126	5.13	40	0	110	0	15.2	0	1.17	1	70.03	1	0	0.136	0	0	0.091	0	0	0	0	0	0	NA						69	93	142	NA	0
36	12	1	0	1	0	0	0	10.89	124	4.8	11	1	66.1	1	18.9	0	1.62	1	500	1	0	19.66	1	0	9.83	1	0	1	1	0	0	66.96	31.25	29.72	1.05	11.2	21.24	30	32	46	NA	1
37	1	1	1	1	0	0	0	3.23	112	3.92	21	1	92.4	0	30.3	0	1.01	1	500	1	0	16.79	1	0	8.52	1	0	1	1	0	0	NA						46	32	44	115	0
38	1	1	0	0	0	0	0	13.97	108	3.42	3	1	78.3	1	26.1	0	7.24	1	500	1	0	15.37	1	0	7.16	1	0	1	1	0	0	NA						176	256	281	275	0
39	1	1	1	0	0	0	0	1.45	114	4.16	10	1	70.5	1	9.21	1	5.52	1	500	1	0	30.48	1	0	14.33	1	0	1	1	0	0	NA						140	460			0
40	1	1	1	0	0	0	0	6.22	159	5.71	12	1	99.3	0	21.7	0	1.58	1	500	1	0	30.97	1	0	14.45	1	0	1	1	0	0	NA						100	107	101		0
41	1	1	0	0	0	0	0	9.13	101	3.47	13	1	72.9	1	11.6	0	1.99	1	500	1	0	20.56	1	0	23.71	1	0	1	1	0	0	NA						260	457	353	173	0
42	2	0	0	0	0	0	0	2.68	102	3.36	11	1	65.8	1	14.4	0	6.01	1	85.7	1	0	0.85	0	0	0.07	0	0	1	1	0	0	NA						343	255	329	267	0
43	2	1	0	0	0	0	0	10	87	2.88	3	1	116	0	12	0	6.61	1	500	1	0	23.46	1	0	8	1	0	1	1	0	1	NA						266	330	284	212	0
44	3	0	0	0	1	0	0	9.97	113	4.3	11	0	61.8	1	14.1	0	3.8	1	500	1	0	15.4	1	0	6.76	1	0	1	1	0	0	NA						353	345			0
45	4	0	0	0	0	0	0	12.23	113	4.05	9	1	58.8	1	9.7	1	1.15	1	500	1	0	18.98	1	0	10.7	1	0	1	1	0	0	NA						224				0
46	6	1	0	0	0	0	0	15.73	112	4.17	11	1	96.8	0	18.5	0	2.93	1	445.3	1	0	12.11	1	0	16.56	1	0	1	1	0	0	NA						26	17	NA		1
47	7	1	0	0	0	0	0	8.39	106	3.99	10	1	NA		NA		4.48	1	500	1	0	21.97	1	0	12.59	1	0	1	1	0	0	NA						573	341	396	286	0
48	8	1	0	0	0	0	0	6.89	117	4.57	18	1	89.9	1	13.1	0	1.02	1	500	1	0	16.04	1	0	9.8	1	0	1	1	0	0	57.81	32.77	19.7	1.66	8.33	34.69	294	172	147		0
49	8	0	0	0	0	0	0	9.26	130	4.28	31	0	79.2	1	15.2	0	1.74	1	500	1	0	17.27	1	0	9.2	1	0	1	1	0	0	NA						465	217	343		0
50	9	0	0	0	0	0	0	7.39	109	3.92	15	1	72.6	1	12.9	0	3.41	1	500	1	0	13.24	1	0	7.81	1	0	1	1	0	0	NA						218	314			0
51	9	0	1	0	0	0	0	9.36	121	4.41	53	0	118	0	18.6	0	1.44	1	500	1	0	3.62	1	0	0.084	0	0	1	1	0	0	NA						218	49	26	236	0
52	9	1	0	0	1	1	0	7.33	118	5.1	14	1	97	0	15.9	0	4.46	1	500	1	0	17.88	1	0	10.18	1	0	1	1	0	0	NA						182				0
53	9	1	0	0	1	1	0	8.42	116	4.29	9	1	96.9	0	26.9	0	17.09	1	429.7	1	0	8.84	1	0	5.54	1	0	1	1	0	0	NA						346	325			0
54	10	1	0	0	0	0	0	14.12	113	3.44	45	0	92.3	0	19.9	0	1.76	1	93.24	1	0	7.57	1	0	0.098	0	0	0	1	0	0	NA						242	291	394	291	0
55	11	1	0	0	0	0	0	15.36	113	3.66	11	1	90.2	0	14.9	0	1.08	1	500	1	0	27.02	1	0	13.73	1	0	1	1	0	0	NA						177	417	245	NA	0
56	11	1	0	0	0	0	0	8.55	112	4.1	23	1	83.7	1	21.1	0	2.12	1	148.5	1	0	2.29	1	0	0.065	0	0	1	1	0	0	NA						197	231	254	NA	0
57	2	0	1	0	1	0	0	9.7	124	4.41	3	1	162	0	25	0	0.339	0	500	1	0	17.06	1	0	10.39	1	1	1	1	1	0	NA						285	NA	NA	NA	0
58	7	1	1	0	1	0	1	6.9	96	3.45	1	1	153	0	17.3	0	0.6	0	500	1	0	27.62	1	0	6.64	1	1	1	1	1	1	82.34	5.54	76.73	0.07	10.79	6.81	361	367	241		0
59	10	0	1	0	1	0	0	8.4	132	4.96	14	1	90.7	0	18.9	0	0.551	0	500	1	0	17.11	1	0	9.32	1	1	1	1	1	0	69.17	37.94	27.48	1.38	3.12	26.26	675	309	326		0
60	11	0	0	0	0	0	0	8.8	131	4.99	28	1	103	0	15.9	0	0.294	0	500	1	0	14.22	1	0	8.09	1	1	1	1	1	0	NA						145	146	113		0
61	11	0	0	1	0	0	0	5	128	4.55	76	0	87.4	1	26.2	0	0.212	0	0.15	0	0	0.018	0	0	0.096	0	1	0	0	0	0	NA						319	139	104	134	0
62	11	1	1	1	0	0	0	5.5	113	4.08	4	1	83.8	1	17.5	0	0.267	0	500	1	0	14.87	1	0	7.98	1	1	0	0	1	0	76.29	44.5	23.67	1.88	7.11	16.55	197	168	268		0
63	12	0	0	1	0	0	0	11.3	103	4.03	10	1	9.9	1	21.6	0	0.232	0	495.7	1	0	23.82	1	0	7.72	1	1	1	1	1	1	70.6	45.11	23.15	1.95	4.65	23.05	300	219	196		0
64	3	0	0	0	0	0	0	6.9	129	4.59	52	0	68.1	1	13.8	0	0.25	0	158	1	0	0.199	0	0	0.099	0	1	0	0	1	0	NA						110	NA			0
65	5	1	0	0	0	0	0	8.2	131	4.86	6	1	90.1	0	17.5	0	0.241	0	500	1	0	17.55	1	0	9.86	1	1	1	1	1	0	NA						237	189	167		0
66	8	1	0	0	0	0	0	16.1	135	5.06	3	1	107	0	24.1	0	0.284	0	500	1	0	13.38	1	0	7.33	1	1	1	1	1	1	82.28	10.3	58	0.18	9.98	7.44	394	250	300	NA	0
67	4	0	0	0	0	0	0	11.45	125	4.75	12	1	78.7	1	18.8	0	0.268	0	500	1	0	15.91	1	0	9.12	1	1	1	1	1	0	73.34	36.45	34.37	1.06	8.24	16.13	347				0
68	5	0	0	1	0	0	0	12.83	105	5.81	56	0	90.9	0	26.1	0	0.195	0	12.25	1	0	0.019	0	0	0.089	0	1	0	0	0	0	49.77	26.39	17.14	1.54	19.48	29.75	50	301			0
69	8	0	1	0	0	0	0	7.81	121	4.35	9	1	112	0	18	0	0.206	0	500	1	0	17.24	1	0	12.66	1	1	1	1	0	0	NA						169	57	48	NA	1
70	10	0	1	0	0	0	0	10.77	124	4.62	11	1	93.6	0	27.7	0	0.374	0	500	1	0	16.83	1	0	9.35	1	1	1	1	1	0	90.29	21.25	63.27	0.34	5.03	4.67	116	241	337	301	0
71	10	1	1	0	1	0	0	6.28	118	4.59	10	1	84.4	1	13.4	0	0.224	0	500	1	0	33.51	1	0	8.49	1	1	1	1	0	0	NA						135	113	172		0
72	11	1	0	0	0	0	0	12.42	119	4.42	23	1	109	0	21.8	0	0.336	0	500	1	0	13.76	1	0	8.68	1	1	1	1	0	0	NA						263	344	377	NA	0
73	6	0	1	0	0	0	0	5.74	126	4.26	9	1	67	1	14	0	0.206	0	500	1	1	15.52	1	0	8.86	1	0	1	1	0	0	74	45.95	21.8	2.11	5.76	20.1	143	46	40	7	1
74	7	0	0	0	0	0	0	10.7	143	5.25	32	0	108	0	14.2	0	0.459	0	500	1	1	0.02	0	0	0.083	0	0	0	0	0	0	NA						387	233	151		0
75	2	1	1	0	0	0	0	11.5	127	4.94	45	0	107	0	25.2	0	0.314	0	225	1	0	47.85	1	1	0.07	0	0	1	1	0	0	NA						256	263	272	156	0
76	3	1	1	0	0	0	0	9.5	140	5	13	1	93.5	0	19.5	0	0.295	0	0.15	0	0	0.726	0	1	0.067	0	0	1	1	0	0	NA						230	310	357		0
77	4	0	1	0	0	0	0	5.2	125	4.32	6	1	109	0	23.7	0	0.249	0	293.5	1	0	0.068	0	1	0.072	0	0	1	1	1	0	NA						153	161	76	44	1
78	9	0	0	0	0	0	0	5.7	121	4.26	59	0	65.7	1	9.65	1	0.222	0	0.15	0	0	0.017	0	1	0.093	0	0	0	0	0	0	64.07	41.13	17.32	2.38	4.45	29.05	214	244	151	130	0
79	9	1	0	0	0	0	0	12.9	135	4.73	8	1	81.1	1	8.27	1	0.581	0	500	1	0	19.1	1	1	12.45	1	0	1	1	0	0	NA						507	152	39	64	1
80	12	0	0	0	0	0	0	7.5	113	4.51	11	1	77	1	26.1	0	0.231	0	500	1	0	18.76	1	1	9.5	1	0	1	1	0	0	NA						200	457	NA		0
81	12	0	1	0	0	0	0	4.5	120	4.34	32	0	71.2	1	20.3	0	0.221	0	0.15	0	0	0.018	0	1	0.093	0	0	1	1	0	0	NA						164	NA			0
82	5	0	0	0	0	0	0	9.5	131	5.04	32	0	135	0	22.6	0	0.282	0	294.1	1	0	4.49	1	1	3.22	1	0	1	1	1	0	50.16	27.28	17.86	1.53	11.4	34.28	140	97	13	79	1
83	6	1	1	0	0	0	0	6.9	114	4.08	24	1	116	0	27.6	0	0.241	0	443.7	1	0	10.42	1	1	0.081	0	0	1	1	0	0	NA						397	23	54	26	1
84	9	1	1	0	0	0	0	7.69	138	4.88	4	1	84.2	1	18.2	0	0.168	0	288.6	1	0	30.71	1	1	3.18	1	0	1	1	0	0	NA						190	94	161	NA	0
85	10	1	1	0	0	0	0	13.14	133	4.78	13	1	109	0	25.6	0	0.209	0	0.15	0	0	0.019	0	1	0.09	0	0	1	1	0	0	NA						191	46	90	NA	0
86	1	1	0	1	0	0	0	3.32	130	4.82	12	1	110	0	18.7	0	0.224	0	500	1	0	24.71	1	1	11.39	1	0	1	1	0	0	NA						306	624			0
87	8	0	1	0	0	0	0	3.4	115	4.02	7	1	72	1	16.6	0	1.49	1	500	1	0	28.2	1	1	14.73	1	0	1	1	1	0	NA						203	403	289		0
88	6	1	0	0	0	0	0	10.95	117	5.06	22	1	108	0	23.7	0	9.94	1	499.6	1	1	13.61	1	0	7.63	1	0	1	1	0	0	96.35	25	54.21	0.46	8.36	7.09	414				0
89	2	1	1	0	0	0	0	10.1	106	4.26	16	1	119	0	9.56	1	0.247	0	500	1	0	14.31	1	1	9.523	1	1	1	1	0	0	NA						422	23	147	240	0
90	4	0	0	0	1	0	0	7.8	116	4.37	13	1	139	0	37.3	0	0.302	0	108	1	0	0.021	0	1	0.073	0	1	1	0	0	0	NA						260	259	156		0
91	3	1	0	0	1	0	0	12.8	119	4.42	6	1	103	0	13	0	0.478	0	500	1	0	29.3	1	1	12.87	1	1	1	1	1	1	84.57	19.95	61.97	0.32	3.82	9.04	559	304	327	270	0
92	4	1	0	0	1	0	0	6.5	124	5.17	8	1	98.1	0	10.7	0	0.741	0	500	1	1	26.26	1	0	15.3	1	1	1	1	1	0	NA						321	331	353		0
93	2	1	1	0	1	0	0	6.99	123	4.49	9	1	111	0	16.6	0	8.44	1	500	1	1	50.14	1	0	11.18	1	0	1	1	0	0	NA						176	285	297		0
94	12	0	1	1	0	0	1	7.26	127	4.43	12	1	64.7	1	16	0	0.381	0	451.1	1	1	33.72	1	0	5.5	1	1	1	1	0	0	NA						267	287	38	NA	1
95	2	1	0	0	0	0	1	13.8	110	3.76	1	1	82.5	1	12.1	0	1.24	1	500	1	0	31.8	1	1	6.77	1	0	1	1	0	0	NA						446	356	283		0
96	4	0	1	0	0	0	0	11.5	113	4.12	6	1	134	0	17.8	0	18.96	1	201.6	1	0	38.64	1	1	3.97	1	1	1	1	1	0	NA						175	137	152		0
97	5	0	0	0	0	0	0	5.4	100	4.42	24	1	19.9	1	12.6	0	3.76	1	500	1	0	18.21	1	1	9.63	1	0	1	1	0	0	NA						100	239	244		0
98	7	1	0	0	0	0	0	8.6	118	4.6	19	1	79.3	1	14.6	0	3.67	1	500	1	0	16.39	1	1	8.73	1	0	1	1	0	0	NA						407	434	386	236	0
99	8	0	0	0	0	0	0	5.4	113	4.29	2	1	105	0	18.2	0	4.87	1	500	1	0	21.63	1	1	11.78	1	0	1	1	1	0	NA						360	165	243	334	0
100	2	1	1	0	1	0	0	5.79	101	4.09	23	1	98.3	0	19.8	0	13.76	1	500	1	0	29.82	1	1	7.19	1	0	1	1	0	0	61.31	17.99	33.45	0.54	20.56	20.32	151	205	NA		0

## Sheet:  no-herpes virus infection
name	onset of months	Gender(male=1)	age≥3	Fever(yes=1)	lever(yes=1)	spleen(yes=1)	Epistaxis(yes=1)	WBC	Hb	RBC	PLT	PLT＜30-1	C3	C4	CMVM1	CMVM1-1	CMVG1	CMVG1-1	HSVM positive-1	HSV1G1	HSV1Gpositive-1	HSV2Mpositive-1	HSV2G1	HSV2G1-1	EBVCAM positive-1	EBVCAGpositive-1	EBNAGpositive-1	EBVEAM positive-1	EBVEAGpositive-1	CD3A54-80	CD4A25-40	CD8A18-30	CD4/80.98-1.94	CD16+568.1-25.6	CD19A7-20	PLTcharge	PLT(1 month)	PLT(3months)	PLT(12 months)	chronic(yes=1)
1	1	1	0	0	0	0	0	5.3	145	5.15	26	1	96.1	26.1	0.211	0	500	1	0	17.65	1	0	10.83	1	0	1	1	0	0	NA						114	103	78	66	1
2	1	0	1	0	0	0	0	7.7	135	4.47	47	0	104	12.6	0.19	0	0.15	0	0	7.66	1	0	0.067	0	0	1	1	0	0	NA						155	153	32	50	1
3	1	0	0	0	0	0	0	7.5	82	2.77	55	0	93.6	26.3	0.7	0	500	1	0	14.76	1	0	8.4	1	0	1	1	0	1	NA						109	408	436		0
4	1	1	1	1	0	0	1	6.1	111	3.88	9	1	121.1	25.9	0.235	0	500	1	0	16.2	1	0	10.41	1	0	1	1	0	0	NA						184	189	154	166	0
5	1	0	0	0	0	0	0	7.4	113	4.22	13	1	77.1	12.5	0.266	0	500	1	0	16.14	1	0	10.76	1	0	1	1	0	0	NA						445	245	126		0
6	1	1	1	0	0	0	0	5.9	129	4.52	20	1	103	10.8	0.304	0	341	1	0	66.7	1	0	4.46	1	0	1	1	0	0	NA						215	148	166		0
7	1	1	1	0	0	0	0	6.8	105	4.49	14	1	99	16	0.193	0	500	1	0	18.16	1	0	4.65	1	0	1	1	0	0	NA						131	244	50	92	1
8	1	1	1	0	0	0	0	4.8	123	4.76	15	1	127	19.5	0.262	0	83.84	1	0	14.3	1	0	0.011	0	0	1	1	0	0	NA						156	143	166		0
9	1	1	1	0	0	0	0	10.2	125	4.63	65	0	88	22.5	0.239	0	22.56	1	0	14.8	1	0	0.065	0	0	1	1	0	0	NA						194	6	96	133	0
10	1	1	0	0	0	0	0	6.9	116	4.64	12	1	77.5	12.1	0.245	0	500	1	0	14.68	1	0	9.38	1	0	1	1	0	0	NA						369	345	405		0
11	1	1	1	0	0	0	1	25.2	141	5.08	39	0	67.7	14.4	0.172	0	0.15	0	0	6.53	1	0	0.038	0	0	1	1	0	0	NA						158	115	66	35	1
12	1	1	0	1	0	0	0	8.1	117	4.4	33	0	86	30.1	0.265	0	277.6	1	0	0.017	0	0	0.065	0	0	0	0	0	0	69.05	46.91	17.5	2.68	8.35	20.48	141	109	85	121	0
13	1	1	1	0	0	0	0	6.6	136	5.05	10	1	92.4	11.2	0.249	0	500	1	0	18.65	1	0	11.47	1	0	1	1	0	1	NA						150	247	317		0
14	1	1	0	0	0	0	1	7.49	89	3.94	22	1	133	21.7	0.309	0	491.6	1	0	20.1	1	0	3.04	1	0	1	1	0	0	47.57	25.93	17.87	1.45	4.62	44.9	460	261	265		0
15	1	0	0	0	0	0	0	9.2	109	4.22	8	1	123	18.3	0.375	0	500	1	0	27.66	1	0	17.53	1	0	1	1	0	0	54.16	33.57	17.11	1.96	11.94	31.15	273	349	235		0
16	2	1	1	0	0	0	0	8	115	4.43	10	1	71.8	74.9	0.209	0	0.15	0	0	53.45	1	0	0.067	0	0	1	1	0	0	NA						486	37	2	NA	1
17	2	1	1	0	0	0	0	10.9	137	5.15	13	1	132	26.3	0.274	0	500	1	0	16.55	1	0	10.2	1	0	1	1	0	0	NA						199	165	188		0
18	2	0	0	1	0	0	0	5.2	127	4.5	20	1	77.5	10.9	0.47	0	69.3	1	0	0.018	0	0	0.018	0	0	0	0	0	0	NA						186	107	35	142	0
19	2	1	1	0	0	0	0	4.2	122	4.49	20	1	102.2	14.3	0.243	0	500	1	0	16.24	1	0	10.18	1	0	1	1	0	0	NA						294	219	276	201	0
20	2	0	0	1	0	0	0	5.3	123	4.95	20	1	97.6	7.47	0.255	0	500	1	0	30.9	1	0	18.18	1	0	1	1	0	0	NA						259	63	33	189	0
21	2	1	0	0	0	0	0	7.38	111	4.61	49	0	104	26.1	0.257	0	461.9	1	0	0.019	0	0	0.066	0	0	1	1	0	0	NA						152	124	209	311	0
22	2	1	0	0	0	0	0	7.4	128	4.53	6	1	69.2	8.05	0.21	0	500	1	0	18.72	1	0	10.77	1	0	0	1	0	0	NA						236	352	329	338	0
23	2	0	1	0	0	0	1	9.41	119	4.9	1	1	97.5	14.1	0.386	0	500	1	0	63.01	1	0	17.09	1	0	0	1	0	0	NA						424	292	288		0
24	2	0	1	0	0	0	1	9.8	128	4.26	6	1	116	18.3	0.434	0	325.7	1	0	31.59	1	0	0.008	0	0	1	1	0	0	NA						240	23	106	93	1
25	2	0	1	1	0	0	0	11.1	141	5.01	13	1	92.4	18.3	0.336	0	37.91	1	0	13.65	1	0	0.034	0	0	1	1	0	0	NA						115	68	96	94	1
26	2	1	1	0	0	0	0	6.8	105	4.49	14	1	99	16.5	0.193	0	500	1	0	16.53	1	0	10.32	1	0	1	1	0	0	NA						156	34	35	82	1
27	3	0	1	0	0	0	0	4.7	86	2.99	11	1	84.5	13	0.362	0	388.7	1	0	10.72	1	0	5.8	1	0	0	0	0	0	NA						135	475	26	165	0
28	3	0	0	0	0	0	0	10.2	104	4.43	26	1	82.4	13.3	0.217	0	192.5	1	0	0.019	0	0	0.069	0	0	0	0	0	0	NA						231	145	51	96	1
29	3	0	1	0	0	0	0	9.9	134	4.92	59	0	100	13	0.331	0	10.9	1	0	0.018	0	0	0.069	0	0	1	1	0	0	NA						154	128	140	154	0
30	3	1	0	0	0	0	0	8.8	114	4.32	17	1	96.6	17.5	0.24	0	500	1	0	14.27	1	0	8.47	1	0	1	1	0	0	NA						154	130	122	143	0
31	3	1	0	0	0	0	0	7.5	112	4.76	8	1	90.8	11.7	0.346	0	303.5	1	0	0.016	0	0	0.076	0	0	0	0	0	0	NA						94	537	293	358	0
32	3	1	1	0	0	0	0	11.8	124	4.68	63	0	137	22.5	0.331	0	209.3	1	0	0.018	0	0	0.069	0	0	0	0	0	0	NA						178	211	234		0
33	3	1	0	0	0	0	0	7.3	81	2.67	1	1	116	16.2	0.223	0	500	1	0	19.39	1	0	9.12	1	0	1	1	0	0	NA						624	204	306		0
34	3	0	0	0	0	0	0	9.8	113	4.3	30	1	119	21.6	0.273	0	309.2	1	0	0.019	0	0	0.067	0	0	0	0	0	0	NA						57	282	286		0
35	3	0	0	0	0	0	0	9	122	4.95	16	1	119	18.5	0.469	0	500	1	0	18.32	1	0	10.77	1	0	1	1	0	0	NA						157	190	236		0
36	3	1	1	0	0	0	0	7.9	130	5.11	84	0	93.7	12	0.228	0	391	1	0	0.351	0	0	0.069	0	0	0	0	0	1	NA						83	106	133		0
37	4	1	0	0	0	0	0	6.1	129	4.45	6	1	103	9.84	0.259	0	500	1	0	23.45	1	0	14.25	1	0	0	1	1	0	NA						141	231	219	185	0
38	4	0	0	0	0	0	0	8.9	112	4.68	36	0	74.2	8.93	0.236	0	128.7	1	0	4.11	1	0	1.47	1	0	0	0	0	0	NA						116	67	132		0
39	4	0	1	0	0	0	0	13.1	122	4.42	5	1	89.2	16.2	0.294	0	500	1	0	18.55	1	0	10.79	1	0	1	1	0	1	NA						163	32	23	60	1
40	4	1	1	0	0	0	0	8.1	136	5.17	3	1	84.1	11.9	0.579	0	500	1	0	27.09	1	0	15.2	1	0	1	1	1	0	NA						137	86	66	65	1
41	4	1	1	0	0	0	0	9.3	129	4.72	11	1	100	18.7	0.224	0	500	1	0	17.23	1	0	9.84	1	0	1	1	0	1	NA						240	NA			0
42	4	1	0	1	1	0	0	12.9	127	5.18	21	1	56.2	15.2	0.241	0	500	1	0	13.62	1	0	8.29	1	0	1	1	0	0	NA						395	496	410		0
43	4	1	0	0	0	0	0	6.8	133	5.01	56	0	NA	NA	0.221	0	126.3	1	0	0.021	0	0	0.068	0	0	0	0	0	0	NA						96	65	93	186	0
44	4	1	0	1	0	0	0	5.2	128	4.84	55	0	101	25.2	0.269	0	328.4	1	0	0.021	0	0	0.07	0	0	0	0	0	0	NA						184	204	61	121	0
45	4	1	0	0	0	0	0	5	104	4.3	2	1	94	14.4	0.226	0	500	1	0	15.1	1	0	8.73	1	0	1	1	0	0	NA						118	85	171	34	1
46	4	1	0	1	0	0	0	10	127	4.5	5	1	119	17.9	0.269	0	500	1	0	18.13	1	0	8.26	1	0	1	1	0	1	NA						337	327	306		0
47	5	1	0	0	0	0	0	14.5	121	4.82	1	1	74.1	7.21	0.868	0	500	1	0	39.88	1	0	20.4	1	0	1	1	0	1	NA						129	96	39	33	1
48	5	1	1	0	0	0	0	12.8	144	5.38	16	1	134	18.4	0.231	0	500	1	0	56.19	1	0	15.98	1	0	1	1	0	0	NA						240	96	176	256	0
49	5	0	1	0	0	0	0	6.5	145	4.95	29	1	84.6	10.8	0.492	0	479.2	1	0	0.068	0	0	0.081	0	0	1	1	0	0	NA						43	56	156		0
50	5	1	0	0	0	0	0	11.5	118	4.85	7	1	117	30	0.663	0	500	1	0	16.29	1	0	9.06	1	0	1	1	0	0	NA						562	366	286		0
51	5	1	1	0	0	0	0	8.6	108	4.11	16	1	130	17.3	0.328	0	304.7	1	0	75.56	1	0	5.57	1	0	1	1	0	0	NA						66	56	26	NA	1
52	5	0	0	0	0	0	0	9.2	124	4.83	5	1	102	11.4	0.227	0	500	1	0	25.73	1	0	12.52	1	0	1	1	0	0	NA						606	378	289		0
53	5	1	0	0	0	0	0	16.9	133	5.12	12	1	94	23.2	0.428	0	500	1	0	30.92	1	0	16.87	1	0	1	1	0	0	NA						879	465	333	326	0
54	5	0	0	1	0	0	0	10.6	124	4.69	26	1	130	20.6	0.245	0	0.868	0	0	0.022	0	0	0.081	0	0	0	0	0	0	NA						560	379	366		0
55	5	0	0	0	0	0	0	6	137	5.01	13	1	86.8	24	0.238	0	500	1	0	30.6	1	0	9.68	1	0	1	1	0	0	NA						185	188	196		0
56	5	0	0	0	1	0	0	10.9	107	3.93	16	1	60.1	11.8	0.311	0	500	1	0	27.7	1	0	15.38	1	0	1	1	0	0	NA						592	422	383		0
57	5	1	1	0	0	0	0	7.8	129	4.77	30	1	126	17.1	0.252	0	54.5	1	0	0.02	0	0	0.066	0	0	1	1	0	0	NA						559	338	275		0
58	5	0	1	0	0	0	0	7.2	142	5.01	53	0	94.6	11.4	0.244	0	122.7	1	0	68.08	1	0	0.071	0	0	1	1	0	0	NA						68	67	98	81	1
59	5	0	0	0	0	0	0	6.5	127	4.56	9	1	93.4	19.2	0.258	0	500	1	0	22.7	1	0	13.01	1	0	1	1	0	0	NA						330	568	368		0
60	5	1	1	0	0	0	0	5.8	126	4.46	30	1	108.1	20.1	0.222	0	0.15	0	0	0.021	0	0	0.067	0	0	0	0	0	0	NA						195	48	54	22	1
61	6	1	1	0	0	0	0	6.2	120	4.37	26	1	101	18.06	0.446	0	500	1	0	20.34	1	0	10.68	1	0	1	1	0	0	NA						513	99	35	38	1
62	6	1	1	0	0	0	1	3.8	102	3.48	8	1	83.3	16	0.224	0	489.34	1	0	43.5	1	0	7.11	1	0	1	1	1	1	74	32.64	30.48	1.07	7.4	17.39	488	NA			0
63	6	0	1	0	0	0	0	7.8	131	4.67	42	0	129	23.9	0.235	0	187.4	1	0	0.017	0	0	0.089	0	0	1	1	0	0	NA						189	254	247		0
64	6	1	1	1	0	0	0	13.3	121	4.4	15	1	104	21.5	0.538	0	500	1	0	19.31	1	0	8.24	1	0	1	1	0	0	NA						497	575	289		0
65	6	0	1	0	0	0	0	7.3	115	4.14	5	1	106	28.2	0.203	0	500	1	0	16.56	1	0	8.63	1	0	1	1	0	0	NA						270	266	189		0
66	6	0	0	1	1	0	0	7.5	112	4.71	16	1	71.2	7.69	0.745	0	500	1	0	25.2	1	0	13.11	1	0	1	1	0	0	NA						161	90	71	167	0
67	6	0	0	1	1	0	0	8.2	119	4.61	10	1	99.3	23.1	0.205	0	492.5	1	0	13.18	1	0	7.32	1	0	1	1	0	0	NA						760	380	269		0
68	6	1	0	1	1	0	0	6	104	4.28	27	1	76.4	22.2	0.212	0	0.634	0	0	0.052	0	0	0.081	0	0	0	0	0	0	NA						503	336	268	285	0
69	6	1	1	0	0	0	0	10.2	132	4.93	16	1	137	18.2	0.234	0	13.34	1	0	0.017	0	0	0.076	0	0	1	1	0	0	NA						305	564	315		0
70	6	0	1	1	0	0	0	9	101	5.64	24	1	99.2	17.2	0.268	0	500	1	0	32.19	1	0	13.93	1	0	1	1	0	0	NA						191	102	384	406	0
71	6	0	0	0	0	0	0	3.5	116	4.5	3	1	59.5	18	0.252	0	500	1	0	12.76	1	0	6.85	1	0	1	1	0	0	NA						507	250	71	41	1
72	6	0	0	0	0	0	1	4.8	114	4.1	1	1	101	16	0.249	0	500	1	0	27.65	1	0	7.92	1	0	1	1	0	0	NA						291	74	54	76	1
73	7	0	0	0	0	0	0	13	132	4.79	9	1	83.4	13.9	0.206	0	500	1	0	32.02	1	0	16.33	1	0	1	1	0	0	NA						172	209	215	178	0
74	7	1	0	1	0	0	0	12.5	115	4.72	24	1	107	14.1	0.308	0	500	1	0	19.26	1	0	9.8	1	0	1	1	0	0	NA						160	389	289		0
75	7	1	1	0	0	0	0	7	111	4.76	70	0	87.9	14.9	0.263	0	29.52	1	0	29.6	1	0	0.091	0	0	1	1	0	0	74.11	44	22.3	1.97	6.63	17.97	67	67	76	89	1
76	7	1	0	1	1	0	0	4.6	116	4.77	26	1	81.6	26	0.213	0	1.79	1	0	0.038	0	0	0.089	0	0	0	0	0	0	53.19	35.16	13.56	2.59	20.73	23.62	324	379	265		0
77	7	0	0	0	0	0	0	13.1	113	4.73	1	1	NA	NA	0.271	0	500	1	0	19.34	1	0	10.34	1	0	1	1	0	0	NA						396	172	56	186	0
78	7	1	0	0	1	0	0	9.4	116	4.57	10	1	82.9	16.2	0.212	0	500	1	0	18.5	1	0	9.81	1	0	1	1	0	0	NA						175	125	156	保肝	0
79	7	1	1	0	0	0	0	8.1	133	4.25	83	0	103	17.2	0.206	0	63.8	1	0	22.78	1	0	0.089	0	0	0	0	0	0	75.73	29.8	37.78	0.79	8.44	13.97	141	131	146		0
80	7	1	1	0	0	0	0	7	144	5.39	11	1	120	18	0.228	0	422.2	1	0	4.14	1	0	0.09	0	0	1	1	0	0	72.72	36.08	23.29	1.55	10.8	14.08	149	115	56	86	1
81	7	1	0	0	0	0	0	6.1	133	5.36	2	1	81.6	13.3	0.268	0	500	1	0	18.29	1	0	10.07	1	0	1	1	0	0	NA						489	392	375	167	0
82	7	1	1	0	0	0	0	10.1	120	4.11	11	1	88.6	15.4	0.275	0	36.91	1	0	9.79	1	0	0.09	0	0	1	1	0	0	NA						183	56	89	87	1
83	8	1	1	0	0	0	0	8.2	149	5.44	29	1	92.2	14.7	0.27	0	490.1	1	0	75.14	1	0	6.99	1	0	1	1	0	0	77.66	40.14	26.01	1.54	3.39	18.7	162	56	28	83	1
84	8	0	0	0	0	0	0	6.5	107	4.3	13	1	104	15.9	0.307	0	500	1	0	12.7	1	0	6.58	1	0	1	1	0	0	NA						329	115	284	303	0
85	8	1	0	1	0	0	1	5.6	126	4.74	34	0	93.9	29.3	0.212	0	0.15	0	0	0.018	0	0	0.095	0	0	1	1	0	0	58.24	31.72	17.94	1.77	13.31	26.98	249	111	169		0
86	8	1	0	0	0	0	0	9.3	127	4.61	18	1	108	12.3	0.203	0	500	1	0	28.28	1	0	14.47	1	0	1	1	0	1	52.16	36.63	10.74	3.41	7.42	37.72	412	359	337	285	0
87	8	1	0	0	1	0	0	5	112	4.14	9	1	90.4	24.2	0.367	0	500	1	0	13.78	1	0	7.36	1	0	1	1	0	0	NA						637	180	197		0
88	8	1	0	0	0	0	0	8.1	109	4.49	24	1	92.8	13.9	0.289	0	500	1	0	18.36	1	0	9.65	1	0	1	1	0	0	68.57	41.45	34.62	1.68	4.05	26.38	536	135	70	58	1
89	8	0	0	0	1	0	0	10	126	4.8	9	1	88.2	13.4	0.241	0	500	1	0	18.61	1	0	9.82	1	0	1	1	0	0	NA						225	50	NA		0
90	8	0	0	0	0	0	0	5.9	114	4.12	24	1	130	23.5	0.205	0	135.5	1	0	5.43	1	0	2	1	0	1	1	0	0	63.66	19.11	37.66	0.51	33.19	2.31	118	90	62	43	1
91	8	0	0	0	0	0	0	6.5	121	5.11	44	0	70.5	27.8	0.018	0	94.75	1	0	0.068	0	0	0.092	0	0	0	0	0	0	79.12	43.57	33.74	1.29	9.06	10.67	252	405	126		0
92	8	1	0	0	0	0	0	4.1	115	4.23	27	1	99.4	21.5	0.285	0	500	1	0	16.06	1	0	8.31	1	0	1	1	0	0	NA						291	304	234		0
93	8	1	0	0	1	1	0	17.59	89	3.07	11	1	78.7	13	0.933	0	304.4	1	0	6.08	1	0	3.59	1	0	1	1	0	0	NA						124	60	86	156	0
94	8	0	0	0	0	0	0	8.8	118	4.42	18	1	86.5	8.32	0.242	0	500	1	0	20.37	1	0	10.88	1	0	1	1	0	0	NA						319	515	329	190	0
95	8	0	1	0	0	0	0	10.1	133	4.42	23	1	165	11.4	0.228	0	500	1	0	17.83	1	0	9.63	1	0	1	1	0	0	68.41	38.32	21.59	1.78	3.64	26.34	260	22	53	108	0
96	8	0	1	0	0	0	0	12.2	115	6.31	28	1	75.7	6.75	0.209	0	107.6	1	0	0.062	0	0	0.092	0	0	1	1	0	0	NA						123	53	55	161	0
97	9	1	0	0	1	0	0	8.5	110	3.56	6	1	NA	NA	0.887	0	500	1	0	13.47	1	0	7.16	1	0	1	1	0	0	76.11	53.53	20.1	2.66	4.2	19.35	198	334	268		0
98	9	0	1	0	0	0	0	8.3	120	4.18	8	1	115	26	0.233	0	500	1	0	37.69	1	0	9.98	1	0	1	1	0	1	73.93	50.28	18.98	2.65	3.27	22.38	255	736	590	293	0
99	9	0	0	0	1	0	0	6.4	106	4.31	5	1	84.7	11.4	0.351	0	500	1	0	18.9	1	0	10.05	1	0	0	1	0	0	NA						165	75	161	166	0
100	9	1	0	0	0	0	0	7.2	125	4.83	17	1	85.6	11.6	0.242	0	144.7	1	0	0.018	0	0	0.092	0	0	1	1	0	0	NA						139	110	212		0
101	9	0	1	0	0	0	0	5	128	4.54	11	1	89	17.9	0.261	0	500	1	0	33.11	1	0	0.091	0	0	1	1	0	0	71.64	33.08	32.69	1.01	9.44	16.17	129	34	59	63	1
102	9	1	0	1	1	1	0	3.8	112	4.47	8	1	NA	NA	0.337	0	498.3	1	0	14.66	1	0	7.843	1	0	1	1	0	0	63.15	33.83	23.1	1.46	2.39	33.36	202	25	34	45	1
103	9	1	0	0	0	0	0	20.7	127	5.04	17	1	114	30.2	0.213	0	53.95	1	0	2.02	1	0	0.094	0	0	1	1	0	0	64.73	36.11	28.23	1.28	16.15	17.91	66	59	37	NA	1
104	9	1	0	0	0	0	0	11.1	117	4.24	6	1	82.4	16.8	0.233	0	500	1	0	15.89	1	0	8.25	1	0	1	1	0	1	69.13	29.54	36.01	0.82	9.17	19.69	191	85	220	320	0
105	9	1	1	0	0	0	0	8.5	125	4.4	10	1	106	22.1	0.223	0	468.7	1	0	13.79	1	0	7.5	1	0	1	1	0	0	80.46	27.7	45.65	0.61	5.72	11.1	312	298	265		0
106	9	1	0	0	0	0	0	9.5	113	4.33	86	0	106	17.8	0.539	0	25.77	1	0	0.017	0	0	0.094	0	0	0	0	0	0	74.46	40.92	30.26	1.35	2.37	20.46	74	58	54	NA	1
107	9	0	0	0	1	0	0	8.1	117	4.41	11	1	72.2	16.9	0.373	0	500	1	0	6.85	1	0	7.32	1	0	1	1	0	1	NA						269	102	56	74	1
108	9	1	0	0	0	0	1	7.1	120	4.98	13	1	136	36.4	0.236	0	500	1	0	17.496	1	0	9.06	1	0	1	1	0	0	NA						837	338	372	275	0
109	9	0	0	0	1	0	0	6.4	106	4.31	5	1	84.7	11.4	0.351	0	500	1	0	18.99	1	0	10.05	1	0	0	1	0	0	NA						165	75	165	166	0
110	9	0	0	0	0	0	0	11.2	115	4.57	25	1	104	13.2	0.29	0	500	1	0	25.67	1	0	12.67	1	0	1	1	0	0	NA						177	101	198	133	0
111	10	0	1	0	0	0	0	13.4	126	4.38	70	0	NA	NA	0.326	0	78.31	1	0	21.8	1	0	0.095	0	0	1	1	1	0	74.75	44.6	22.38	1.99	6.25	17.02	174	NA			0
112	10	1	0	0	0	0	0	10.8	116	4.46	7	1	124	45.4	0.27	0	500	1	0	15.34	1	0	8.47	1	0	1	1	0	0	NA						344	228	169	243	0
113	10	1	1	0	1	1	0	10.3	125	4.34	24	1	105	28.7	0.231	0	500	1	0	20.83	1	0	10.96	1	0	1	1	0	0	NA						302	123	296	173	0
114	10	0	0	0	0	0	0	12.5	118	5.1	16	1	88.9	19.9	0.319	0	431.8	1	0	13.44	1	0	9.52	1	0	1	1	0	0	NA						127	54	NA		1
115	10	0	1	1	0	0	0	8.5	128	4.49	13	1	112	9.74	0.281	0	500	1	0	25.61	1	0	13.09	1	0	1	1	0	0	NA						178	82	31	5	1
116	10	1	1	1	0	0	1	5.7	81	3.1	6	1	84.9	19	0.265	0	500	1	0	18.9	1	0	10.28	1	0	1	1	0	0	69.02	46.35	21.05	2.2	3.21	25.39	200	160	189		0
117	10	1	1	0	0	0	0	8	140	5.03	39	0	112	22.4	0.195	0	225.3	1	0	5.25	1	0	0.098	0	0	1	1	0	0	62.16	28.32	28.46	1	27.27	9.6	103	96	47	86	1
118	10	0	1	0	1	1	0	9.7	134	5.07	4	1	111	19.6	0.237	0	500	1	0	74.87	1	0	5.28	1	0	1	1	0	0	NA						107	36	25	39	1
119	10	1	0	0	0	0	0	5	124	4.87	20	1	121	18.7	0.317	0	5.13	1	0	1.55	1	0	0.092	0	0	1	0	0	0	69.8	33.86	28.67	1.18	10.37	18.9	176	213	250		0
120	10	1	0	0	0	0	0	11.7	128	5.06	14	1	95.6	11.2	0.222	0	500	1	0	16.27	1	0	8.86	1	0	1	1	0	0	NA						770	496	320		0
121	10	1	1	0	0	0	1	8.5	120	4.58	11	1	86.8	14.8	0.269	0	500	1	0	30.6	1	0	12.77	1	0	1	1	0	0	NA						140	189	178	194	0
122	10	0	1	0	0	0	0	10.3	133	4.56	10	1	80.9	12.1	0.247	0	500	1	0	53.5	1	0	12.11	1	0	1	1	1	0	NA						112	120	161		0
123	10	1	0	0	0	0	0	7.9	121	4.53	38	0	118	18	0.269	0	108.3	1	0	0.018	0	0	0.096	0	0	0	0	0	0	73.34	45.84	24.77	1.85	5.76	19.87	200	223	127	265	0
124	10	1	0	0	0	0	0	9.6	121	4.43	30	1	108.8	17.2	0.251	0	6.71	1	0	0.648	0	0	0.221	0	0	0	0	0	0	62.7	43.58	15.13	2.88	4.19	29.97	176	204	60	70	1
125	10	1	1	0	0	0	0	6.6	122	4.58	19	1	97.2	23.1	0.228	0	500	1	0	15.57	1	0	8.23	1	0	1	1	0	0	73.12	49.27	16.61	2.97	5.72	17.98	230	59	46	73	1
126	10	1	0	0	0	0	0	17.6	91	3.05	30	1	NA	NA	0.642	0	500	1	0	21.72	1	0	35.15	1	0	1	1	0	1	NA						354	256	250		0
127	10	1	0	0	1	0	0	6.1	105	4.1	7	1	137	9.73	0.697	0	500	1	0	21.49	1	0	11.88	1	0	0	1	0	0	NA						248	NA			0
128	10	0	1	0	0	0	0	14.3	127	4.58	9	1	99.6	12.8	0.2	0	500	1	0	60.8	1	0	13.92	1	0	0	1	0	0	NA						46	NA			0
129	11	1	1	0	0	0	0	5.3	130	4.52	8	1	88.3	13.3	0.248	0	500	1	0	20.78	1	0	10.71	1	0	1	1	1	0	NA						91	92	123		0
130	11	0	0	0	0	0	0	12.7	117	4.59	16	1	74.2	8.98	0.363	0	500	1	0	5.25	1	0	3.21	1	0	1	1	0	0	NA						156	72	16	192	0
131	11	0	1	0	0	0	0	5.7	113	4.04	37	0	95.2	16.8	0.263	0	500	1	0	0.018	0	0	0.093	0	0	1	1	0	0	83.63	41.64	34.66	1.2	3.18	12.05	173	110	147	187	0
132	11	1	0	0	0	0	0	8.2	106	4.16	20	1	107	22.1	0.624	0	500	1	0	14.86	1	0	7.95	1	0	1	1	0	1	NA						385	326	252		0
133	11	1	0	0	0	0	0	7	116	4.94	28	1	78.9	11.2	0.21	0	500	1	0	18.38	1	0	9.2	1	0	1	1	0	1	66.84	39.26	19.64	1.97	8.89	20.77	157	55	65	281	0
134	11	1	0	0	0	0	0	24.6	123	4.54	10	1	112	22.6	0.23	0	500	1	0	15.45	1	0	8.11	1	0	1	1	0	0	54.11	29.78	22.33	1.33	8.83	25.16	170	327	227		0
135	11	1	0	0	0	0	0	6.4	112	4.13	56	0	90.8	14.8	0.699	0	74.18	1	0	0.018	0	0	0.094	0	0	0	0	0	0	NA						122	144	NA		0
136	11	1	0	0	1	0	0	4.7	81	2.77	3	1	111	19.5	0.943	0	287.1	1	0	23.35	1	0	5.7	1	0	1	1	0	0	53.87	26.84	25.23	1.06	9.61	31.8	205	107	213		0
137	11	1	1	1	0	0	0	8.5	128	4.98	46	0	146	24	0.199	0	0.15	0	0	0.018	0	0	0.093	0	0	0	1	0	0	73.16	36.94	33.31	1.11	5.53	18.89	178	73	156	79	1
138	11	1	1	0	0	0	0	13.9	120	4.79	36	0	90.1	26.8	0.213	0	229.1	1	0	6.48	1	0	0.097	0	0	1	1	0	0	65.4	36.3	25.19	1.44	7.77	24.74	116	71	NA		1
139	11	0	0	0	1	0	0	11.8	114	4.11	25	1	138	25.7	0.354	0	500	1	0	17.03	1	0	8.64	1	0	1	1	0	0	NA						364	50	109	49	1
140	11	0	1	0	0	0	0	6.9	121	4.03	6	1	87.5	11.5	0.248	0	500	1	0	16.12	1	0	8.12	1	0	0	1	1	0	75.36	44.68	26.73	1.67	4.56	16.3	186		NA		0
141	11	1	1	0	0	0	0	10.3	109	4.15	10	1	110	8.76	0.239	0	500	1	0	15.12	1	0	7.67	1	0	1	1	0	1	69.58	35.13	28.93	1.21	4.2	24.48	481	39	42	59	1
142	11	0	1	0	0	0	0	2.3	146	5.19	57	0	78.9	23.6	0.216	0	0.15	0	0	8.78	1	0	0.099	0	0	0	0	0	0	NA						179	59	143		0
143	11	1	0	0	1	0	0	5.7	84	2.9	12	1	NA	NA	0.229	0	500	1	0	25.65	1	0	9.76	1	0	1	1	0	0	NA						158	213	206		0
144	11	1	0	0	0	0	0	6.8	112	4.38	5	1	97.2	19.2	0.293	0	500	1	0	30.06	1	0	5.26	1	0	1	1	0	0	77.55	48.61	23.68	2.05	3.99	17.45	259	305	222		0
145	11	1	1	0	0	0	0	3.7	135	4.97	11	1	85.5	17.3	0.225	0	500	1	0	16.56	1	0	8.14	1	0	1	1	0	0	NA						180	44	91	109	1
146	12	1	0	0	0	0	0	7.3	128	4.94	73	0	103	18.4	0.212	0	110.6	1	0	27.47	1	0	0.093	0	0	0	0	0	0	NA						175	96	88	156	1
147	12	1	1	0	0	0	0	8.3	119	4.46	48	0	103	17.6	0.287	0	57.92	1	0	0.018	0	0	0.095	0	0	1	1	0	0	NA						225	195	252	285	0
148	12	1	1	0	0	0	0	12.2	142	5.13	55	0	100	19.2	0.24	0	149.2	1	0	0.017	0	0	0.094	0	0	0	0	0	0	NA						252	208	232		0
149	12	1	1	1	0	0	0	9.3	138	4.82	10	1	73.9	25	0.284	0	500	1	0	143.4	1	0	15.23	1	0	1	1	0	0	71.32	34.56	28.18	1.23	10.52	15.18	471	NA			0
150	12	0	0	0	0	0	0	14.1	147	5.11	13	1	115	35.4	0.612	0	492.1	1	0	9.12	1	0	5.75	1	0	1	1	1	0	NA						752	96	28	NA	1
151	12	1	0	0	0	0	0	11.4	134	5.1	10	1	58.3	7.82	0.314	0	500	1	0	19.64	1	0	11.05	1	0	1	1	0	0	NA						149	163	203		0
152	1	1	1	1	0	0	0	3	132	4.86	11	1	84.6	37	0.218	0	500	1	0	14.88	1	0	7.62	1	0	1	1	0	0	70.42	27.17	34.07	0.8	4.25	21.98	122	304	NA		0
153	1	0	0	0	0	0	0	13.3	158	4.74	7	1	59.5	6.2	0.247	0	500	1	0	14.35	1	0	20.49	1	0	1	1	0	1	NA						335	310	NA		0
154	1	1	0	1	0	0	0	5.5	129	4.73	19	1	75.2	19.3	0.281	0	500	1	0	25.59	1	0	14.11	1	0	1	1	0	1	72.98	28.79	41.92	0.69	13.95	12.25	376	240	NA		0
155	1	1	1	0	0	0	0	5.2	128	4.64	72	0	105	17.3	0.223	0	500	1	0	19.85	1	0	11.34	1	0	1	1	0	0	NA						205	225	NA		0
156	1	0	1	1	0	0	0	13.9	139	4.95	25	1	109	10.3	0.592	0	500	1	0	55.49	1	0	12.58	1	0	1	1	1	0	NA						229	336	180	NA	0
157	1	0	0	1	0	0	0	13.4	111	3.6	6	1	NA	NA	0.476	0	500	1	0	22.13	1	0	12.34	1	0	1	1	0	0	NA						458	397	367	313	0
158	1	1	1	1	0	0	0	11.1	133	4.65	26	1	90.7	23	0.352	0	500	1	0	42.62	1	0	11.03	1	0	1	1	0	0	80.4	47.82	29.9	1.6	1.59	15.54	233	78	135	88	1
159	2	0	1	0	0	0	0	7.1	124	4.51	58	0	77.4	16.9	0.213	0	25.16	1	0	0.018	0	0	0.098	0	0	1	1	0	0	67.53	36.35	27.64	1.32	15.78	10.5	119	80	108	46	1
160	2	1	1	0	0	0	0	9.2	121	4.31	6	1	107	19.5	0.188	0	500	1	0	47.43	1	0	10.63	1	0	1	1	0	0	NA						109	63	NA		0
161	2	0	0	0	0	0	0	7.3	115	4.43	10	1	99.6	22.9	0.25	0	500	1	0	14.56	1	0	7.62	1	0	1	1	0	0	82.01	54.98	17.75	3.01	6.27	11.43	269	NA			0
162	2	1	1	0	0	0	0	5.8	137	4.63	24	1	91	19.6	0.202	0	26.92	1	0	0.753	0	0	0.646	0	0	1	1	0	0	86.49	61.61	6.52	9.45	3.84	8.96	300	100	97	36	1
163	2	0	1	1	0	0	0	12.4	118	4.45	22	1	120	27.4	0.218	0	456.8	1	0	21.09	1	0	6.4	1	0	1	1	0	0	75.77	43.67	25.2	1.73	3.02	17.98	173	86	45	58	1
164	2	1	0	1	0	0	0	4.7	122	4.49	6	1	119	16.8	0.179	0	33.8	1	0	0.215	0	0	0.101	0	0	0	0	0	0	NA						117	57	53	NA	1
165	2	0	0	0	0	0	0	5.6	58	1.95	58	0	69.5	11.7	0.787	0	500	1	0	13.84	1	0	6.47	1	0	1	1	0	0	73.9	37.3	33.98	1.1	7.55	16.25	194	258	NA		0
166	2	1	0	0	0	0	0	8.5	123	4.79	10	1	66.6	15.6	0.306	0	500	1	0	28.37	1	0	15.51	1	0	1	1	0	0	73.67	58.15	7.6	7.65	14.97	10.62	402	303	359		0
167	2	1	1	1	0	0	0	3.6	136	5.25	34	0	73.5	24.4	0.172	0	0.15	0	0	0.018	0	0	0.099	0	0	1	1	0	0	77.67	53.02	21.07	2.52	3.02	16.27	125	94	53		0
168	2	1	1	0	0	0	0	8.3	135	5.35	33	0	88.5	18.3	0.276	0	500	1	0	0.035	0	0	0.119	0	0	1	1	0	0	NA						40	51	67	95	1
169	3	0	0	0	0	0	0	8	119	4.64	9	1	81.7	11.3	0.824	0	500	1	0	20.73	1	0	10.83	1	0	1	1	0	0	70.14	45.72	23.21	1.97	7.37	21.44	484	NA	7		1
170	3	0	1	0	0	0	1	7.07	107	3.68	27	1	78	14.8	0.159	0	0.15	0	0	0.018	0	0	0.101	0	0	1	1	0	0	63.2	40.74	16.66	2.45	2.43	30.74	153	57	127	NA	0
171	3	0	0	1	0	0	0	8.3	136	5	22	1	87.6	15.7	0.209	0	500	1	0	16.24	1	0	9.16	1	0	1	1	0	0	74.51	46.5	25.26	1.84	2.28	23.26	200	108	39	35	1
172	3	1	1	0	0	0	0	13.2	123	4.5	46	0	66.3	16.1	0.393	0	306.1	1	0	0.875	0	0	0.633	0	0	1	1	0	0	72.08	38.27	28.61	1.34	5.6	18.42	107	136	103	NA	0
173	3	1	0	0	0	0	0	8.1	112	4.01	50	0	NA	NA	0.274	0	44.89	1	0	0.298	0	0	0.098	0	0	0	0	0	0	NA						53	79	NA		1
174	3	0	0	0	0	0	0	10.3	116	4.46	55	0	57.1	10.5	0.241	0	79.54	1	0	0.019	0	0	0.101	0	0	0	0	0	0	67.35	42.95	16.54	2.6	6.72	25.44	172	138	124		0
175	3	0	0	0	0	0	0	7.3	84	4	12	1	75.5	9.35	0.178	0	1.19	1	0	0.042	0	0	0.223	0	0	0	0	0	0	NA						279	272	226	NA	0
176	3	0	0	0	0	0	0	13.2	100	3.59	4	1	NA	NA	0.416	0	500	1	0	13.55	1	0	7.38	1	0	1	1	0	0	NA						164	NA		317	0
177	3	1	1	1	0	0	0	6.4	120	4.16	8	1	89.1	17	0.186	0	467.8	1	0	14.89	1	0	7.87	1	0	1	1	0	0	NA						150	221	205	NA	0
178	3	1	1	1	0	0	0	9.1	128	4.63	18	1	113	14.4	0.747	0	317.6	1	0	0.019	0	0	0.085	0	0	0	0	1	0	68.43	39.88	23.95	1.67	10.97	16.8	292	49	76	133	0
179	3	1	1	1	0	0	1	3.49	82	3.03	21	1	76.2	16	0.257	0	500	1	0	35.27	1	0	17.86	1	0	1	1	0	0	NA						183	306	384	NA	0
180	4	0	0	0	0	0	0	12.7	117	4.58	1	1	81.5	17.2	0.228	0	500	1	0	20.18	1	0	11.11	1	0	1	1	0	0	NA						422	334	NA		0
181	4	1	1	1	0	0	0	11.2	138	5.16	30	1	143	12.8	0.304	0	500	1	0	12.43	1	0	7.35	1	0	0	0	0	0	NA						105	134	56	21	1
182	4	1	0	0	0	0	0	7.3	134	4.5	28	1	104	12.4	0.21	0	500	1	0	27	1	0	14.85	1	0	1	1	0	0	68.01	39.75	20.74	1.92	5.37	23.33	368	246	206	221	0
183	4	1	1	1	0	0	0	4.2	122	4.78	74	0	120	25.4	0.19	0	75.35	1	0	0.02	0	0	0.08	0	0	0	0	0	0	NA						234	NA			0
184	4	1	0	0	0	0	0	4.5	100	3.03	11	1	NA	NA	0.231	0	500	1	0	30.02	1	0	9.6	1	0	1	1	0	0	NA						271	NA			0
185	4	1	0	0	0	0	1	16.2	119	4.54	34	0	125	27.7	0.176	0	282.4	1	0	0.019	0	0	0.082	0	0	0	0	0	0	66.91	41.04	21.18	1.94	19.67	11.45	99	30	38	35	1
186	4	1	0	0	1	0	0	11.6	117	4.23	87	0	90.9	10.7	0.227	0	395.8	1	0	0.02	0	0	0.083	0	0	1	1	0	0	79.95	40.43	36.29	1.11	3.66	15.38	87	82	NA		1
187	4	1	1	0	0	0	0	9.1	136	5.04	15	1	113	19.3	0.616	0	500	1	0	19.4	1	0	10.68	1	0	1	1	0	0	71.74	48.3	18.33	2.64	3.57	23.42	325	417	NA		0
188	4	1	1	1	0	0	0	6.2	124	4.69	24	1	109	20.1	0.286	0	0.15	0	0	0.02	0	0	0.082	0	0	0	0	0	0	NA						237	NA			0
189	4	1	0	0	0	0	0	10.6	115	4.79	13	1	74.6	24.9	0.358	0	500	1	0	16.24	1	0	9.14	1	0	1	1	0	0	NA						251	247	NA		0
190	4	0	0	1	0	0	0	6.2	113	4.6	45	0	114	18.8	0.225	0	14.96	1	0	0.033	0	0	0.08	0	0	0	0	1	0	NA						282	185	NA		0
191	4	0	0	1	0	0	0	5.8	104	3.74	27	1	81.9	27	0.375	0	500	1	0	17.75	1	0	10.57	1	0	1	1	0	0	NA						53	34	NA		1
192	4	0	1	1	0	0	0	16.9	95	4.97	7	1	112	22	0.351	0	380.6	1	0	16.71	1	0	6.25	1	0	1	1	0	0	NA						633	345	NA		0
193	4	0	0	1	0	0	0	5.7	121	5.47	4	1	84.1	20.4	0.205	0	500	1	0	33.68	1	0	19.57	1	0	1	1	0	1	NA						464	359	278	285	0
194	4	0	0	0	0	0	0	14.7	115	4.85	9	1	112	19.1	0.2	0	500	1	0	32.61	1	0	18.83	1	0	1	1	0	0	70.22	46.76	22.26	2.1	11.51	15.3	549	313	NA		0
195	4	0	1	0	0	0	0	12	139	4.94	27	1	124	24.8	0.263	0	500	1	0	0.02	0	0	0.08	0	0	0	0	0	0	NA						164	256	NA		0
196	5	0	1	1	0	0	0	6.44	119	4.12	4	1	NA	NA	0.662	0	500	1	0	37.58	1	0	19.2	1	0	1	1	0	0	NA						313	NA			0
197	5	0	1	0	0	0	0	10.04	130	4.65	5	1	110	16.6	0.233	0	500	1	0	36.36	1	0	12.3	1	0	1	1	0	0	NA						402	284	200	201	0
198	5	1	0	1	0	0	0	6.8	119	4.61	12	1	127	34.2	0.185	0	209.7	1	0	0.02	0	0	0.083	0	0	1	1	0	0	49	22.53	21.82	1.03	24.5	23.91	101	NA			1
199	5	1	1	0	0	0	1	4.6	122	4.14	23	1	92.4	16.8	0.184	0	253.4	1	0	6.11	1	0	1.2	1	0	1	1	0	0	72.87	46	20.15	2.28	4.36	19.12	123	36	26	61	1
200	5	0	1	0	0	0	0	6.2	147	4.93	45	0	107	15.7	0.186	0	0.15	0	0	0.342	0	0	0.082	0	0	1	1	0	0	72.61	33.49	32.12	1.04	7.88	18.21	272	171	NA		0
201	5	0	1	0	0	0	0	9.6	124	4.28	32	0	92.9	14.9	0.367	0	101.3	1	0	37.63	1	0	0.082	0	0	1	1	0	0	72.86	35.51	33.97	1.05	11.52	13.09	67	54	70	NA	1
202	5	0	1	0	0	0	0	10.1	124	4.55	71	0	112	23.6	0.218	0	37.87	1	0	102	1	0	0.08	0	0	1	1	0	0	NA						44	88	107	197	0
203	5	1	0	0	1	0	0	9.6	121	3.67	27	1	84.7	16.8	0.459	0	500	1	0	18.62	1	0	10.54	1	0	1	1	0	0	NA						497	440	NA		0
204	5	1	1	1	0	0	0	9.9	134	4.91	29	1	93	16.6	0.185	0	500	1	0	16.13	1	0	9.4	1	0	1	1	0	0	60.92	41.42	14.72	2.81	7.8	29.74	243	319	NA		0
205	5	0	0	1	0	0	0	6.5	130	4.89	67	0	74.9	19.5	0.185	0	0.784	0	0	0.022	0	0	0.081	0	0	0	0	0	0	71.44	39.86	28.02	1.42	2.86	22.65	180	163	NA		0
206	5	1	0	1	0	0	1	12.9	113	4.57	8	1	134	47	0.402	0	34.37	1	0	0.019	0	0	0.085	0	0	0	0	0	0	NA						402	36	28	37	1
207	5	0	0	0	0	0	0	8	131	4.91	48	0	143	26.1	0.19	0	0.15	0	0	0.019	0	0	0.086	0	0	1	0	1	0	NA						91	132	166	221	0
208	5	0	1	0	0	0	0	10.8	131	4.79	23	1	127	13	0.27	0	500	1	0	15.67	1	0	8.64	1	0	1	1	0	0	NA						116	48	37	NA	1
209	5	0	0	0	0	0	0	6.9	112	4.71	10	1	NA	NA	0.424	0	500	1	0	27.3	1	0	15.01	1	0	1	1	0	0	NA						427	293	319	NA	0
210	5	1	1	0	0	0	0	10	133	5.16	10	1	102	15.7	0.184	0	500	1	0	15.42	1	0	8.54	1	0	1	1	0	0	NA						293	295	39	93	1
211	5	0	0	0	0	0	0	10.3	114	4.08	14	1	96.6	24.1	0.209	0	356.9	1	0	10.2	1	0	6.65	1	0	1	1	0	0	NA						136	364	379	NA	0
212	5	1	0	1	0	0	0	6.7	119	4.58	21	1	82.5	14.6	0.231	0	500	1	0	27.44	1	0	14.86	1	0	1	1	0	0	70.28	49.1	19.26	2.55	11.44	17.88	349	361	179	241	0
213	6	1	1	0	0	0	0	7.9	132	4.96	17	1	108	15.8	0.2	0	0.15	0	0	0.019	0	0	0.083	0	0	0	0	0	0	NA						316	NA			0
214	6	1	1	0	0	0	0	8.8	121	4.3	13	1	98.2	16.1	0.232	0	500	1	0	15.8	1	0	8.86	1	0	1	1	0	0	67.56	34.19	27.1	1.26	10.47	17.66	404	139	38	NA	1
215	6	0	0	0	0	0	0	9.4	124	4.65	7	1	137	17	0.233	0	500	1	0	16.78	1	0	9.29	1	0	1	0	0	0	73.94	44.89	22.66	1.98	3.35	21.58	386	241	NA		0
216	6	1	0	0	0	0	0	10.6	119	4.83	12	1	100	17.4	0.596	0	500	1	0	14.98	1	0	8.43	1	0	1	1	0	0	NA						230	17	2	22	1
217	6	0	0	0	1	0	0	9.6	125	5.21	3	1	117	28.7	0.58	0	500	1	0	15.47	1	0	8.78	1	0	1	1	1	0	NA						180	125	NA		0
218	6	0	1	0	0	0	0	9.3	136	4.72	22	1	116	39.7	0.169	0	66.35	1	0	1.59	1	0	1.04	1	0	1	1	0	0	NA						130	29	27	NA	1
219	6	0	1	0	0	0	0	8.3	130	4.59	53	0	96.8	9.35	0.252	0	0.15	0	0	1.12	1	0	0.082	0	0	1	1	0	0	68.93	31.22	25.01	1.25	5.43	23.5	268	221	148	127	0
220	6	0	0	1	0	0	0	6.4	117	4.54	14	1	74.2	15.4	0.332	0	500	1	0	11.2	1	0	7.83	1	0	1	1	0	0	NA						220	510	540	NA	0
221	6	1	1	0	0	0	0	9.9	137	5.35	8	1	141	29	0.246	0	30.96	1	0	61.71	1	0	0.091	0	0	1	1	0	0	68.99	32.23	33.63	0.96	6.47	22.31	415	28	51	NA	1
222	7	0	1	0	0	0	0	7.8	129	4.77	28	1	95.3	14.5	0.238	0	1.49	1	0	0.027	0	0	0.09	0	0	1	1	1	0	NA						248	240	147	NA	0
223	7	1	1	0	0	0	0	12.5	154	5.52	11	1	110	19	0.18	0	500	1	0	16.89	1	0	11.22	1	0	1	1	0	0	NA						224	278	281	283	0
224	7	1	1	0	0	0	0	7.9	134	4.76	85	0	104	18	0.26	0	136.6	1	0	0.019	0	0	0.091	0	0	1	1	0	0	NA						58	108	NA		0
225	7	1	0	0	0	0	0	13.8	128	3.45	22	1	80.9	22.9	0.225	0	500	1	0	18.39	1	0	12.32	1	0	1	1	1	1	75.88	19.99	52.49	0.38	8.76	13.48	217	227	229	379	0
226	7	0	0	0	0	0	0	10.7	130	5.18	7	1	86	14.1	0.248	0	500	1	0	18.24	1	0	9.88	1	0	1	1	0	0	69.95	45.8	18.55	2.47	1.7	24.77	154	84	130	218	0
227	7	0	1	0	0	0	0	9.3	135	4.99	69	0	95.5	11.2	0.217	0	283.1	1	0	0.102	0	0	0.089	0	0	1	1	0	0	65.18	30.25	26.36	1.15	7.31	26.3	108	91	101	98	1
228	7	0	1	0	0	0	0	8.6	117	4.21	3	1	116	21.5	0.216	0	500	1	0	69.27	1	0	12.87	1	0	1	1	0	0	64.56	34.5	17.68	1.95	5.63	29.59	338	41	24	NA	0
229	7	0	1	0	0	0	0	10.1	124	4.53	39	0	94.2	15.1	0.418	0	325.2	1	0	16.6	1	0	0.092	0	0	1	1	0	0	NA						151	236	291	299	0
230	8	1	1	0	0	0	0	10	122	4.51	6	1	96.1	15.7	0.355	0	500	1	0	21.31	1	0	8.53	1	0	1	1	0	0	NA						327	152	46	NA	0
231	8	1	1	0	0	0	0	13.1	114	4.1	28	1	96.7	15.8	0.184	0	137.8	1	0	2.3	1	0	0.089	0	0	1	1	0	0	NA						165	46	15	47	1
232	8	0	1	0	0	0	0	8.2	139	5.08	26	1	102	16.3	0.184	0	122.3	1	0	7.04	1	0	0.087	0	0	1	1	0	0	NA						238	324	209	NA	0
233	8	1	1	0	0	0	0	5.8	127	4.87	16	1	100	26	0.181	0	474.4	1	0	20.64	1	0	0.094	0	0	0	0	0	0	NA						240	237	281	NA	0
234	8	0	0	0	0	0	1	6.99	127	4.49	4	1	97.8	23.1	0.154	0	355.5	1	0	7.36	1	0	0.089	0	0	0	0	0	0	73.9	46.14	19.34	2.39	4.58	19.57	362	78	32	160	0
235	8	0	0	0	0	0	0	10.52	115	4.34	16	1	117	20.1	0.322	0	217.5	1	0	5.53	1	0	2.44	1	0	1	1	0	0	NA						197	34	4	30	1
236	8	0	1	0	0	0	0	7.15	121	4.38	10	1	118	35.4	0.163	0	500	1	0	2.5	1	0	1.63	1	0	1	1	0	0	NA						77	23	12	25	1
237	8	1	0	0	0	0	0	7.7	133	4.78	71	0	87.7	15.5	0.257	0	16.4	1	0	1.62	1	0	0.089	0	0	1	1	0	0	NA						133	88	153	NA	0
238	8	0	0	0	0	0	0	11.13	130	4.95	23	1	104	23.2	0.184	0	500	1	0	14.33	1	0	8.94	1	0	1	1	0	0	NA						245	42	33	52	1
239	8	0	1	0	0	0	1	9.59	123	4.4	25	1	99.9	17.1	0.217	0	500	1	0	16.1	1	0	9.74	1	0	1	1	0	0	NA						217	182	61	97	1
240	8	0	0	0	0	0	0	8.33	110	4	6	1	78.4	15.8	0.329	0	500	1	0	13.2	1	0	8.18	1	0	1	1	0	0	NA						202	110	102	409	0
241	8	0	0	1	0	0	0	6.82	126	4.12	8	1	64.4	21.5	0.205	0	500	1	0	14.07	1	0	8.41	1	0	1	1	1	0	NA						223	178	166	236	0
242	9	1	1	0	0	0	0	10.19	134	5.21	60	0	125	17.5	0.181	0	500	1	0	0.02	0	0	0.092	0	0	0	0	0	0	NA						57	205	360	270	0
243	9	0	1	0	0	0	0	6.42	120	4.5	5	1	117	21.5	0.193	0	0.15	0	0	0.019	0	0	0.088	0	0	0	0	0	0	NA						369	290	316	NA	0
244	9	0	1	0	0	0	0	5.86	112	3.79	4	1	82	14.5	0.314	0	381.7	1	0	34.37	1	0	0.09	0	0	1	1	0	0	72.3	37.54	19.82	1.89	5.13	22.2	67	88	259	301	0
245	9	1	0	0	0	0	0	7.99	117	4.26	7	1	128	16.9	0.202	0	316.4	1	0	10.52	1	0	4.78	1	0	1	1	0	0	78.76	45.74	28.07	1.63	3.28	17.52	203	37	17	NA	1
246	9	1	0	0	0	0	0	12.62	129	5.06	24	1	109	15.4	0.491	0	500	1	0	13.73	1	0	8.33	1	0	1	1	0	0	NA						266	176	69	NA	0
247	9	1	0	1	0	0	0	8.46	109	4.86	60	0	72.7	12.9	0.259	0	450.1	1	0	0.022	0	0	0.092	0	0	0	0	0	0	NA						116	230	243	NA	0
248	9	0	0	1	0	0	0	7.6	115	4.24	4	1	146	27.3	0.224	0	500	1	0	29.57	1	0	16.98	1	0	1	1	0	0	NA						473	368	440	413	0
249	9	1	0	1	0	0	0	5.2	117	4.16	28	1	92.2	29.7	0.252	0	102.5	1	0	0.023	0	0	0.091	0	0	0	0	0	0	NA						384	341	296	NA	0
250	9	1	1	1	0	0	0	9.23	131	4.98	10	1	104	13.3	0.186	0	500	1	0	26.35	1	0	15.18	1	0	1	1	0	0	NA						235	75	29	80	1
251	9	1	0	0	0	0	0	12.25	110	4.35	6	1	86.5	16.1	0.266	0	500	1	0	15.36	1	0	9.2	1	0	1	1	0	0	70.9	51.52	16.69	3.05	3.27	24.91	308	250	114	NA	0
252	9	1	1	1	0	0	0	8.09	123	4.62	10	1	102	11.6	0.305	0	500	1	0	31.87	1	0	16.08	1	0	1	1	0	0	NA						518	81	38	26	1
253	10	1	1	0	0	0	1	7.68	85	3.38	53	0	112	14.2	0.281	0	13.59	1	0	4.71	1	0	0.088	0	0	1	1	0	0	NA						164	43	34	NA	1
254	10	0	0	0	0	0	0	11.32	124	4.99	13	1	73.8	16.1	0.499	0	500	1	0	17.01	1	0	9.63	1	0	1	1	0	0	NA						503	205	139	NA	0
255	10	1	0	0	0	0	0	9.76	124	4.95	7	1	88.9	11.5	0.197	0	500	1	0	18.95	1	0	12.4	1	0	1	1	0	0	NA						132	108	301	NA	0
256	10	0	0	0	0	0	0	14.41	116	4.55	16	1	117	13.8	0.375	0	122.7	1	0	0.097	0	0	0.09	0	0	0	0	0	0	NA						345	266	264	272	0
257	10	0	1	0	0	0	0	7.72	135	4.96	21	1	79.5	16.3	0.237	0	304.6	1	0	10.44	1	0	0.545	0	0	1	1	0	0	NA						61	53	21	NA	0
258	10	1	0	0	0	0	0	6.78	135	4.8	63	0	90.7	26.9	0.151	0	0.15	0	0	0.02	0	0	0.09	0	0	0	0	0	0	NA						68	89	110	NA	0
259	10	0	1	0	0	0	0	14.99	122	4.5	76	0	113	33.9	0.173	0	460.9	1	0	0.323	0	0	0.071	0	0	0	0	0	0	NA						126	89	76	91	1
260	11	1	0	0	0	0	0	10.65	126	5.29	11	1	61.8	13.3	0.18	0	500	1	0	21.63	1	0	12.56	1	0	1	1	0	0	NA						311	548	295	NA	0
261	11	1	1	0	0	1	0	12.13	139	5.29	42	0	123	23.9	0.502	0	319.1	1	0	21.21	1	0	0.077	0	0	1	1	1	0	NA						169	77	130	247	0
262	11	1	1	0	0	0	0	9.08	123	4.53	12	1	90.2	18.5	0.185	0	500	1	0	18.97	1	0	10.75	1	0	1	1	0	0	NA						181	117	262	327	0
263	11	1	1	1	0	0	0	5.25	130	4.97	28	1	109	28.5	0.155	0	47.19	1	0	0.02	0	0	0.074	0	0	0	0	0	0	NA						425	383	414	NA	0
264	11	1	1	0	0	0	0	8.46	134	4.99	34	0	117	27.2	0.169	0	49.36	1	0	0.02	0	0	0.072	0	0	1	1	0	0	NA						112	55	38	59	1
265	11	1	0	0	0	0	0	8.46	129	4.76	11	1	116	23.1	0.885	0	29.35	1	0	0.273	0	0	0.074	0	0	1	1	0	0	72.73	50.39	22.38	2.25	12.13	14.64	250	338	349	NA	0
266	12	1	0	0	0	0	0	10.59	122	4.31	23	1	106	12.6	0.215	0	500	1	0	20.92	1	0	11.77	1	0	1	1	0	0	NA						71	136	127	NA	0
267	12	0	1	0	0	0	0	8.12	133	4.8	12	1	85.7	17.1	0.229	0	467	1	0	13.95	1	0	7.98	1	0	1	1	0	0	76.19	35.77	26.81	1.33	10.26	14.15	135	26	44	NA	1
268	12	0	1	0	0	0	0	8.68	135	4.78	7	1	128	19.8	0.165	0	202	1	0	0.02	0	0	0.082	0	0	0	0	0	0	NA						196	68	28	64	1
269	12	1	0	0	0	0	0	5.68	109	4.41	5	1	79.3	12.4	0.433	0	500	1	0	16.92	1	0	9.88	1	0	1	1	0	0	NA						147	198	179	NA	0
270	12	1	0	0	0	0	0	15.57	100	3.65	51	0	64.7	10.3	0.315	0	3.43	1	0	0.046	0	0	0.077	0	0	1	1	0	1	NA						234	550	215	NA	0
271	12	1	1	0	0	0	0	7.51	142	4.92	62	0	103	12.9	0.184	0	141.1	1	0	0.02	0	0	0.075	0	0	1	1	0	0	NA						70	60	75	NA	0
272	12	1	1	0	0	0	0	14.1	130	4.88	27	1	103	16.5	0.168	0	500	1	0	19.15	1	0	10.79	1	0	1	1	0	0	NA						379	58	47	NA	0
273	12	1	1	0	0	0	1	13.28	139	4.53	8	1	111	23.3	0.499	0	500	1	0	18.12	1	0	9.45	1	0	1	1	0	0	NA						359	515	259	NA	0
274	12	1	0	0	0	0	0	4.8	129	4.84	6	1	104	11.4	0.18	0	39.21	1	0	0.019	0	0	0.076	0	0	0	0	0	0	NA						32	49	166	NA	0
275	12	1	0	0	0	0	0	12.9	106	4.59	62	0	89.8	13.9	0.533	0	236.1	1	0	0.039	0	0	0.074	0	0	0	1	0	0	NA						53	121	NA	NA	0
276	1	1	1	1	0	0	0	4.86	125	4.81	14	1	69.5	18.2	0.456	0	500	1	0	29.13	1	0	13	1	0	1	1	0	0	NA						143	133			0
277	1	1	0	1	0	0	0	15.58	143	5.1	12	1	100	17	0.288	0	500	1	0	13.62	1	0	7.13	1	0	1	1	0	0	73.27	36.58	25.46	1.44	12.84	11.81	137	121			0
278	1	1	0	0	0	0	0	6.66	116	4.25	1	1	97.2	19.4	0.232	0	500	1	0	24.75	1	0	12.31	1	0	1	1	0	0	NA						394	324	335	NA	0
279	1	0	0	0	0	0	1	12.39	113	3.98	7	1	115	15.9	0.195	0	500	1	0	17.21	1	0	8.32	1	0	1	1	0	0	NA						335	223	285	363	0
280	1	1	1	0	0	0	0	6.41	121	4.71	27	1	95.4	25	0.222	0	55.36	1	0	0.02	0	0	0.072	0	0	1	1	0	0	NA						56	39	NA	143	0
281	1	1	1	0	0	0	0	9.86	118	4.3	10	1	113	17.8	0.201	0	500	1	0	16.71	1	0	8.93	1	0	1	1	0	0	NA						339	488	546	395	0
282	1	1	0	1	0	0	0	7.91	140	4.78	23	1	NA	NA	0.207	0	500	1	0	17.85	1	0	8.025	1	0	1	1	0	0	81.48	44.51	34.02	1.31	4.88	13.33	189	50	199		0
283	1	1	0	0	0	0	0	9.19	118	4.64	15	1	93.9	27.6	0.189	0	500	1	0	18.39	1	0	8.87	1	0	1	1	0	0	NA						275	43	15	35	1
284	1	0	1	0	0	0	0	6.44	132	4.56	13	1	112	8.08	0.17	0	500	1	0	19.56	1	0	9.33	1	0	1	1	0	0	NA						340	172	304	232	0
285	1	1	0	0	0	0	0	8.13	109	3.67	13	1	78.9	13	0.65	0	500	1	0	16.99	1	0	8.11	1	0	1	1	0	0	NA						199	307	337	381	0
286	2	1	1	0	0	0	0	6.83	122	4.21	21	1	91	12.6	0.199	0	500	1	0	22.23	1	0	10.89	1	0	1	1	0	0	72.01	43.4	27.24	1.58	0.34	25.82	162	252	247		0
287	2	1	0	0	0	0	0	7.79	129	4.92	36	0	91.7	15.9	0.302	0	34.05	1	0	0.02	0	0	0.071	0	0	1	1	0	0	NA						46	55	54	NA	0
288	2	1	1	0	0	0	0	8.3	144	4.74	37	0	69	13.1	0.156	0	74.09	1	0	29.12	1	0	0.073	0	0	1	1	0	0	69.44	42.04	25.78	1.63	17.02	14.88	56	NA			0
289	3	0	0	0	0	0	0	5.89	114	4.34	36	0	75.7	12.7	0.664	0	500	1	0	21.34	1	0	10.68	1	0	1	1	0	0	NA						275	37	24	NA	0
290	3	1	1	0	0	0	0	7.22	123	4.32	9	1	101	19.8	0.177	0	484.8	1	0	43.73	1	0	6.94	1	0	1	1	0	0	NA						201	NA	273		0
291	3	0	1	1	0	0	0	13.53	115	4.41	23	1	93.8	16.9	0.192	0	500	1	0	28.42	1	0	8.89	1	0	1	1	0	0	68.47	44.33	18.86	2.35	4.27	25.43	159	279	453		0
292	3	0	0	0	0	0	0	15.95	133	4.1	7	1	92.1	21.1	0.344	0	500	1	0	15.98	1	0	8.23	1	0	1	1	0	0	NA						249	286	NA		0
293	3	0	0	1	0	0	0	7.21	127	4.62	34	0	91.4	28.2	0.201	0	422.3	1	0	14.59	1	0	6.8	1	0	1	1	0	0	NA						147	216	196	212	0
294	3	0	0	0	0	0	0	6.98	108	4.02	14	1	70.5	12.7	0.366	0	500	1	0	39.31	1	0	19.14	1	0	1	1	0	0	NA						434	24	28	26	1
295	3	1	0	0	0	0	0	7.51	121	4.47	17	1	103	17	0.352	0	26.19	1	0	0.02	0	0	0.079	0	0	0	0	0	0	NA						190	81	63	NA	1
296	3	1	1	0	0	0	0	11.44	117	4.09	6	1	87.7	15	0.188	0	442.2	1	0	16.63	1	0	7.12	1	0	1	1	0	0	NA						179	242			0
297	3	1	1	0	0	0	0	7.75	117	4.16	16	1	108	22.7	0.371	0	500	1	0	17.86	1	0	9.31	1	0	1	1	0	0	53.86	33.49	16.4	2.04	21.59	23.68	278	163			0
298	3	0	1	1	0	0	0	10.23	117	3.99	54	0	92.3	26.3	0.184	0	0.15	0	0	0.02	0	0	0.079	0	0	1	0	0	0	NA						158	52	46	59	1
299	3	0	1	0	0	0	0	8.44	118	3.97	40	0	112	18.6	0.322	0	500	1	0	10.06	1	0	5.34	1	0	1	1	0	0	78.95	41.11	33.88	1.21	5.46	16.02	133	279			0
300	3	0	1	0	0	0	0	7.95	114	4.26	7	1	76.1	15.4	0.43	0	500	1	0	21.63	1	0	11.3	1	0	1	1	0	0	NA						279	NA	317		0
301	3	1	0	0	0	0	0	10	120	4.23	6	1	113	26.2	0.236	0	500	1	0	18.29	1	0	9.57	1	0	1	1	0	0	NA						379	423			0
302	3	1	0	0	0	0	0	9.52	127	4.97	20	1	75.3	23.3	0.221	0	55.69	1	0	0.02	0	0	0.074	0	0	0	0	0	0	NA						419	464	296	304	0
303	3	1	1	0	0	0	0	14.25	107	4.05	26	1	139	15.2	0.161	0	500	1	0	35.07	1	0	13.45	1	0	1	1	1	0	62	28.03	28.65	0.98	10.27	26.87	46	26	308		0
304	4	1	0	1	0	0	0	7.39	139	5.08	32	0	123	20	0.233	0	38.35	1	0	0.02	0	0	0.076	0	0	0	0	0	0	NA						292	340	410	165	0
305	4	1	1	1	0	0	0	12.87	129	4.38	40	0	96.3	26.8	0.206	0	0.15	0	0	0.02	0	0	0.078	0	0	1	1	0	0	NA						220				0
306	4	0	1	0	0	0	0	8.78	120	4.46	6	1	113	23.3	0.175	0	500	1	0	167.3	1	0	9.84	1	0	1	1	0	0	NA						38	73	116	288	0
307	4	1	1	0	0	0	0	12.56	114	4.72	14	1	81.6	17.6	0.461	0	500	1	0	24.15	1	0	12.39	1	0	1	1	0	0	65.86	37.9	24.95	1.52	4.68	26.96	368				0
308	4	1	0	1	0	0	0	7.64	102	4.03	34	0	90.3	29.7	0.405	0	72.83	1	0	0.159	0	0	0.08	0	0	1	1	0	0	NA						150	43	10	237	0
309	4	0	1	1	0	0	0	2.47	115	4.33	60	0	124	36.4	0.264	0	0.15	0	0	68.1	1	0	0.078	0	0	1	1	0	0	70.51	41.23	25.04	1.65	6.71	21.46	153	199	166		0
310	4	1	0	1	0	0	0	18.18	105	4.54	24	1	120	15.3	0.451	0	42.77	1	0	0.529	0	0	0.701	0	0	0	0	0	0	NA						549	172	314		0
311	4	1	1	1	0	0	0	9.39	69	3.43	60	0	105	13	0.209	0	53.06	1	0	18.23	1	0	4.23	1	0	1	1	0	0	NA						192	24	189	218	0
312	4	1	0	0	0	0	0	13.63	111	4.64	25	1	155	32.8	0.272	0	489.8	1	0	0.019	0	0	0.08	0	0	0	0	0	0	NA						221	424			0
313	4	1	1	0	0	0	0	9.95	114	4.04	14	1	91	12.4	0.157	0	0.15	0	0	4.56	1	0	0.081	0	0	1	1	0	0	NA						447	213	187		0
314	4	1	1	0	0	0	0	12.92	145	5.32	36	0	95.5	24.1	0.168	0	0.15	0	0	0.019	0	0	0.081	0	0	0	1	0	0	57.45	24.99	19.79	1.26	24.75	16.42	22	15	NA		1
315	4	0	0	0	1	0	0	10.75	123	4.08	14	1	77.7	14	0.577	0	500	1	0	18.23	1	0	9.19	1	0	0	1	0	0	73.5	43.81	28.09	1.56	4.7	19.71	438	223	302	250	0
316	5	0	1	0	0	0	0	3.97	128	4.67	7	1	96.5	11.9	0.188	0	500	1	0	59.3	1	0	13.76	1	0	1	1	0	0	58.52	34.09	19.88	1.72	8.02	33.25	174	192	265	272	0
317	5	0	1	0	0	0	0	13.78	127	4.56	55	0	69.4	12	0.186	0	22.3	1	0	0.016	0	0	0.079	0	0	1	1	0	0	NA						73	79	81	105	0
318	5	1	0	0	0	0	0	8.57	116	5.21	25	1	106	16.1	0.538	0	500	1	0	14.42	1	0	8.59	1	0	1	1	0	0	79.76	37.17	37.27	1	7.73	13.61	399	385	328	266	0
319	5	0	0	0	0	0	0	7.45	123	4.38	7	1	100	22.7	0.165	0	463.7	1	0	13.58	1	0	8	1	0	1	1	0	0	NA						278	374			0
320	5	0	0	0	0	0	0	9.34	123	4.3	56	0	67.1	10.2	0.323	0	196.1	1	0	0.019	0	0	0.081	0	0	0	0	0	0	NA						59	NA			0
321	5	1	0	1	0	0	0	5.24	104	4.34	13	1	82.2	26.9	0.201	0	500	1	0	19.73	1	0	11.12	1	0	1	1	0	0	71.11	37.69	30.44	1.24	6.66	21.64	640	344	277	289	0
322	5	0	0	0	0	0	0	15.9	138	5.53	18	1	69.4	11.2	0.221	0	500	1	0	17.67	1	0	10.31	1	0	1	1	0	0	58.27	41.52	14.32	2.9	5.04	36.25	307	348	393	350	0
323	5	0	0	0	1	0	0	10.76	127	4.73	12	1	126	17.3	0.187	0	500	1	0	19.78	1	0	11.05	1	0	1	1	0	0	NA						208	137	209	304	0
324	5	1	0	0	0	0	0	17.47	119	4.62	8	1	142	16.8	0.21	0	500	1	0	15.48	1	0	8.74	1	0	1	1	0	0	NA						198	17	12	427	0
325	5	0	1	0	0	0	0	8.81	132	4.66	67	0	139	27.3	0.467	0	148.7	1	0	0.02	0	0	0.08	0	0	1	1	0	0	NA						106	116			0
326	5	0	1	0	0	0	0	8.03	125	4.82	52	0	80.4	21.2	0.564	0	195	1	0	0.019	0	0	0.081	0	0	0	0	0	0	NA						34	30	NA		1
327	5	1	1	0	0	0	1	6.17	157	5.2	11	1	103	16.9	0.2	0	340.2	1	0	0.019	0	0	0.08	0	0	1	1	0	0	NA						167	12	10	91	1
328	6	1	0	1	0	0	0	11.58	129	5.14	14	1	97.2	22.1	0.24	0	500	1	0	26.47	1	0	14.8	1	0	1	1	0	0	NA						218	27	75	NA	1
329	6	1	1	0	0	0	0	6.72	125	4.63	49	0	137	24.4	0.214	0	30.96	1	0	0.019	0	0	0.084	0	0	0	0	0	0	NA						51	46	NA		0
330	6	1	0	0	1	0	0	5.21	89	2.81	10	1	64.8	12.5	0.181	0	500	1	0	28.07	1	0	12.33	1	0	1	1	0	0	NA						54	56	279	340	0
331	6	0	0	1	0	0	0	15.59	128	4.61	11	1	96.2	16.7	0.544	0	500	1	0	15.06	1	0	8.61	1	0	1	1	0	0	NA						395	308	363		0
332	6	1	1	1	0	0	0	6.56	120	4.28	25	1	92	14	0.216	0	500	1	0	19.62	1	0	11.37	1	0	1	1	0	0	78.96	51.82	20.72	2.5	3.24	17.86	237	281	162	126	0
333	6	1	0	0	0	0	0	9.82	107	3.59	85	0	74.7	12.2	0.179	0	94.87	1	0	0.48	0	0	0.087	0	0	1	1	0	0	NA						106	65	30	297	0
334	6	1	0	0	1	0	0	10.11	111	4.74	25	1	76.3	15.1	0.343	0	500	1	0	12.64	1	0	7.52	1	0	1	1	0	0	75.1	47.54	24.84	1.91	2.48	20.76	254	191	75	47	1
335	6	0	0	0	0	0	0	8.53	107	4.19	12	1	105	33.9	0.303	0	500	1	0	16.32	1	0	9.51	1	0	1	1	0	0	71.31	43.58	17.53	2.49	7.07	20.85	492	385			0
336	6	1	1	0	0	0	0	8.83	123	4.56	31	0	97.9	11.4	0.192	0	500	1	0	13.94	1	0	7.99	1	0	1	1	0	0	NA						242				0
337	6	1	0	0	0	0	0	6.89	119	4.79	25	1	116	23.2	0.281	0	38.07	1	0	0.02	0	0	0.083	0	0	0	0	0	0	NA						41	29	46	NA	0
338	6	1	0	0	0	0	0	13.01	125	4.91	23	1	112	12.4	0.747	0	360.4	1	0	8.33	1	0	5.39	1	0	1	1	0	0	NA						93	25	NA		1
339	6	0	0	0	0	0	0	4.94	120	4.73	8	1	119	18.2	0.226	0	500	1	0	12.4	1	0	7.38	1	0	1	1	0	0	77.51	43.87	30.67	1.43	5.55	15.9	83	14	231	248	0
340	7	1	0	0	0	0	0	8.28	126	4.96	8	0	125	19.7	0.213	0	500	1	0	12.56	1	0	7.89	1	0	1	1	0	0	NA						47	14	NA		0
341	7	1	0	0	0	0	0	9.07	120	4.4	12	1	125	20.6	0.22	0	500	1	0	15.19	1	0	9.53	1	0	1	1	0	0	NA						535	450	374	262	0
342	7	0	1	0	0	0	0	6.82	121	4.47	9	1	103	13.5	0.207	0	500	1	0	15.82	1	0	10.13	1	0	1	1	0	0	NA						244	407	431		0
343	7	0	0	0	0	0	0	14.64	134	4.7	54	0	NA	NA	0.222	0	157	1	0	0.02	0	0	0.082	0	0	1	1	0	0	NA						22	44			0
344	7	0	1	0	0	0	0	7.64	139	4.92	30	1	91.1	13.9	0.199	0	332.7	1	0	0.016	0	0	0.086	0	0	1	1	0	0	NA						398	200	34	NA	0
345	7	1	1	0	0	0	0	9.58	140	5.25	42	0	114	19.6	0.227	0	349	1	0	6.39	1	0	0.097	0	0	1	1	0	0	NA						73	79	63	NA	0
346	7	0	1	0	0	0	0	4.24	128	4.43	22	1	94.9	18.3	0.183	0	0.15	0	0	0.019	0	0	0.083	0	0	1	1	0	0	NA						350				1
347	8	0	0	1	0	0	0	6.28	115	3.95	3	1	89.8	16.5	0.175	0	488.1	1	0	13.29	1	0	8.85	1	0	1	1	0	0	NA						214	140			0
348	8	0	1	0	0	0	0	13.05	145	5.25	79	0	96	14.7	0.228	0	109.1	1	0	28.02	1	0	0.083	0	0	1	1	0	0	NA						56	56	NA		1
349	8	1	1	1	0	0	0	12.18	128	4.7	15	1	89.2	17.2	0.289	0	500	1	0	21.93	1	0	14.83	1	0	1	1	0	0	59.59	31.12	22.68	1.37	10.63	27.61	487	271	225		0
350	8	0	0	0	0	0	0	9.96	111	4.32	7	1	82.6	8.75	0.188	0	500	1	0	16.99	1	0	10.49	1	0	1	1	0	0	NA						104	192	272		0
351	8	0	1	0	0	0	0	7.61	133	4.51	67	0	77.1	11.1	0.252	0	99.14	1	0	0.019	0	0	0.082	0	0	1	1	0	0	NA						71	NA			1
352	8	1	0	0	0	0	0	5.74	132	4.45	33	0	121	29.6	0.342	0	368	1	0	0.02	0	0	0.079	0	0	0	0	1	0	NA						56	29	46	77	1
353	8	0	0	0	1	0	0	5.03	108	3.74	32	0	87.7	16.5	0.894	0	132	1	0	0.049	0	0	0.09	0	0	1	1	0	0	NA						282	506		310	0
354	9	1	1	0	0	0	0	7.99	128	4.83	45	0	94.7	14.4	0.202	0	0.15	0	0	0.019	0	0	0.08	0	0	0	0	0	0	NA						65	205	246		0
355	9	1	0	0	0	0	0	9.13	116	4.47	14	1	79.5	12.5	0.288	0	500	1	0	31.14	1	0	9.01	1	0	1	1	0	0	NA						173	33	15	71	1
356	9	1	0	0	0	0	0	10.26	120	4.78	8	1	85.3	18.1	0.222	0	500	1	0	18.89	1	0	10.51	1	0	1	1	0	0	NA						145	269			0
357	9	0	1	0	0	0	0	9	138	5.09	38	0	117	29.5	0.173	0	500	1	0	16.49	1	0	9.5	1	0	1	1	0	0	NA						127	81	118	121	0
358	9	1	1	0	0	0	0	19.58	132	4.95	42	0	110	12.4	0.211	0	500	1	0	22.02	1	0	12.39	1	0	1	1	0	0	NA						191	212	284		0
359	9	0	0	0	0	0	0	7.1	111	3.84	10	1	101	10.8	0.33	0	500	1	0	20.9	1	0	12.03	1	0	1	1	0	0	NA						331	387			0
360	10	1	1	0	0	0	0	6.94	122	4.76	45	0	102	18.3	0.202	0	500	1	0	13.16	1	0	20.58	1	0	1	1	0	0	NA						236	33	105		0
361	10	0	1	1	0	0	0	7.6	118	4.46	26	1	118	22.6	0.176	0	500	1	0	14.38	1	0	8.62	1	0	1	1	0	0	NA						365	364	205		0
362	10	1	1	0	0	0	0	8.77	137	5.03	8	1	93.6	19.1	0.19	0	500	1	0	28.18	1	0	15.53	1	0	1	1	0	0	NA						86	78	60	NA	0
363	10	0	0	0	0	0	0	9.47	116	4.4	17	1	87.4	8.4	0.203	0	500	1	0	16.15	1	0	9.68	1	0	1	1	0	0	NA						203	176	242		0
364	10	0	1	0	1	0	0	4.97	117	4.38	10	1	59.3	2.57	0.177	0	500	1	0	19.25	1	0	10.79	1	0	1	1	0	0	NA						413	NA	118	81	0
365	10	1	1	0	0	0	0	14.65	136	5.23	58	0	115	26.6	0.181	0	500	1	0	0.019	0	0	0.09	0	0	0	0	0	0	NA						63	55	63	122	0
366	10	1	1	0	0	0	0	5.33	98	3.84	10	1	97.3	22	0.285	0	500	1	0	10.16	1	0	6.6	1	0	1	1	0	0	NA						508	42	144		0
367	11	1	1	0	0	0	1	11.11	141	5.47	24	1	104	15.3	0.228	0	500	1	0	28.1	1	0	7.93	1	0	1	1	0	0	NA						206	333	314	NA	0
368	11	1	1	1	0	0	0	7.44	120	4.51	32	0	124	21.2	0.177	0	210.1	1	0	11.08	1	0	0.072	0	0	1	1	0	0	NA						159	36	39	NA	1
369	11	0	0	0	1	0	0	4.15	75	2.61	16	1	NA	NA	0.251	0	500	1	0	12.77	1	0	7.3	1	0	1	1	0	1	NA						15	395	340	NA	0
370	11	1	0	0	0	0	0	7.06	94	3.28	5	1	110	16.8	0.921	0	500	1	0	21.78	1	0	12.01	1	0	1	1	0	0	NA						243	342	404		0
371	11	1	1	0	0	0	0	7.92	141	4.75	15	1	92.8	18.7	0.199	0	500	1	0	14.52	1	0	9.36	1	0	1	1	0	0	NA						378	272	14	NA	1
372	12	1	1	0	0	0	0	10.52	121	4.46	11	1	108	20.8	0.222	0	500	1	0	17.8	1	0	9.78	1	0	1	1	0	0	NA						307	156	58	NA	0
373	12	1	1	0	0	0	1	4.06	129	4.72	29	1	124	29.5	0.761	0	141.1	1	0	17.49	1	0	0.066	0	0	1	1	0	0	NA						30	56	32	NA	1
374	12	1	1	0	0	0	0	10.1	134	5.41	85	0	90.7	18.6	0.207	0	127.1	1	0	14.75	1	0	0.067	0	0	1	1	0	0	NA						102	78	95	NA	0
375	12	0	1	0	0	0	1	8.05	141	5.25	40	0	84.2	11.9	0.168	0	88.16	1	0	7.04	1	0	0.068	0	0	1	1	0	0	NA						479	206	66	NA	0
376	12	1	0	0	0	0	1	8.41	127	4.51	26	1	101	32.5	0.182	0	500	1	0	19.4	1	0	11.7	1	0	1	1	0	0	NA						425	364	360	NA	0
377	12	0	1	1	0	0	1	5.5	119	4.29	8	1	79.7	40	0.174	0	500	1	0	20.85	1	0	12.6	1	0	1	1	0	0	NA						202	36	109	NA	0
378	12	1	0	0	0	0	0	16.76	119	4.71	14	1	113	19	0.194	0	500	1	0	17.46	1	0	10.52	1	0	1	1	0	0	NA						248	226	340	NA	0
379	12	0	0	0	0	0	0	8.26	117	4.68	18	1	91.4	14.5	0.217	0	500	1	0	18.06	1	0	10.99	1	0	1	1	0	0	NA						195	86	157	NA	0
380	12	0	1	0	0	0	1	8.05	141	5.25	40	0	84.2	11.9	0.168	0	88.16	1	0	7.04	1	0	0.068	0	0	1	1	0	0	NA						479	206	66	NA	0
